1 **Phloem loading via the abaxial bundle sheath cells in maize leaves**

2

3

4 **Margaret Bezruczyk<sup>1</sup>, Nora R. Zöllner<sup>1</sup>, Colin P. S. Kruse<sup>2</sup>, Thomas Hartwig<sup>1</sup>, Tobias**  
5 **Lautwein<sup>3</sup>, Karl Köhrer<sup>3</sup>, Wolf B. Frommer<sup>1,4,\*</sup> and Ji-Yun Kim<sup>1</sup>**

6

7

8 **AFFILIATIONS**

9 <sup>1</sup> Institute for Molecular Physiology, Heinrich-Heine-University Düsseldorf, Düsseldorf 40225,  
10 Germany

11 <sup>2</sup> Los Alamos National Laboratory, Los Alamos, New Mexico, USA, 87545

12 <sup>3</sup> Biological and Medical Research Center (BMFZ), Genomics and Transcriptomics Laboratory  
13 (GTL), Medical Faculty, Heinrich Heine University Düsseldorf, Düsseldorf, Germany

14 <sup>4</sup> Institute of Transformative Bio-Molecules (WPI-ITbM), Nagoya University, Chikusa, Nagoya  
15 464-8601, Japan

16

17 \* Correspondence: [frommew@hhu.de](mailto:frommew@hhu.de)

18

19 **ABSTRACT**

20 Leaves are asymmetric, with differential functionalization of abaxial and adaxial tissues. The  
21 bundle sheath (BS) surrounding the vasculature of the C3 crop barley is dorsoventrally  
22 differentiated into three domains: adaxial structural, lateral S-type, and abaxial L-type. S-type cells  
23 seem to transfer assimilates towards the phloem. Here we used single-cell RNA sequencing to  
24 investigate BS differentiation in C4 maize. Abaxial BS (<sup>ab</sup>BS) cells of rank-2 intermediate veins  
25 specifically expressed three SWEET sucrose uniporters (*SWEET13a*, *b*, and *c*) and UmamiT amino  
26 acid efflux transporters. *SWEET13a*, *b*, *c* were also identified in the phloem parenchyma (PP). Thus  
27 maize acquired a unique mechanism for phloem loading in which <sup>ab</sup>BS cells provide the main  
28 pathway for apoplasmic sucrose transfer towards the phloem. This pathway predominates in veins  
29 responsible for phloem loading (rank-2 intermediate), while rank-1 intermediate and major veins  
30 export sucrose from the phloem parenchyma (PP) adjacent to the sieve element companion cell  
31 (SE/CC) complex, as in Arabidopsis. We surmise that <sup>ab</sup>BS identity is subject to dorsoventral  
32 patterning and has components of PP identity. These observations provide first insights into the  
33 unique transport-specific properties of <sup>ab</sup>BS cells and support for a modification to the canonical  
34 phloem loading pathway of maize, which may be generalizable to other C4 monocots.

35

36

37

38 **KEYWORDS**

39 Single cell sequencing, *Zea mays* L., SWEET, SUT, sucrose, transporter, UmamiT, amino acid  
40 transporter

41

## 42 INTRODUCTION

43 Leaves are typically asymmetric: there are often differences in the relative stomatal and trichome  
44 densities and cuticle properties between the abaxial and adaxial leaf surfaces. While maize leaves  
45 are amphistomatic, asymmetry remains apparent, with bulliform cells only on the adaxial side and  
46 a conjoint, collateral and closed-type vasculature, with adaxial xylem and abaxial phloem.  
47 Dorsoventral patterning in maize leaf is initiated in the shoot apical meristem at the earliest stages  
48 of leaf primordia development by expression of *RGD2* (*Ragged seedling2*) (Henderson et al., 2006)  
49 and adaxial expression of *RLD1* (*Rolled leaf1*), which is conferred by miRNA166-mediated *RLD1*  
50 transcript cleavage on the abaxial side (Juarez et al., 2004b, 2004a). This pattern is maintained  
51 throughout development by specific localization of numerous transcription factors, including the  
52 abaxial expression of *KANADI* (Candela et al., 2008). Bundle sheath cells (BSCs) of maize are not  
53 known to be functionally differentiated. In barley leaves, the BSCs are anatomically distinct:  
54 abaxial side “L-type” BSC have large chloroplasts, while “S-type” BSCs, with small chloroplasts,  
55 surround the rest of the mestome sheath. It was proposed that the S-type cells may be specialized  
56 for photoassimilate transport, based on the rapid disappearance of starch after the light period and  
57 the abundant plasmodesmatal connections between S-type cells, mestome sheath, and phloem  
58 (Williams et al., 1989). In maize, the two abaxial BSCs (<sup>ab</sup>BSCs) are typically smaller compared to  
59 the medial BSCs. *In situ* hybridization and immunolocalization had shown that Rubisco, the  
60 glutamine synthetase isoform GS1-4 (*GLN3*), and malic enzyme localized specifically to BS, with  
61 transcripts and proteins equally represented in all BSCs (Langdale et al., 1988a; Martin et al., 2006).  
62 Here we used single cell RNA sequencing (scRNA-seq) to test whether the BS of the C4 plant  
63 maize is uniform or also shows a dorsoventral differentiation of its cells, as found in barley. The  
64 analysis identified mesophyll- and bundle sheath-specific transcripts and found that the BS could  
65 be subclustered into two groups, one specifically expressing a variety of genes including SWEET13  
66 sucrose transporters, UmamiT and AAP amino acid transporters, as well as several transcription

67 factors. *In situ* hybridization and analysis of translational GUS fusions demonstrated that the  
68 subclustering was due to dorsoventral patterning, as evidenced by the finding that the three  
69 SWEET13 paralogs were specifically expressed in <sup>ab</sup>BS. These findings not only show that the  
70 maize leaf BS is functionally differentiated, but also identify a unique pathway for apoplasmic  
71 phloem loading in a C4 plant. In addition, the three SWEET13s were also present in cells that most  
72 likely represent the phloem parenchyma, similar to the profiles of their Arabidopsis orthologs  
73 AtSWEET11, 12, and 13. Maize <sup>ab</sup>BS thus appears to use a combination of dorsoventral patterning  
74 and PP identity to drive sucrose into the apoplasm of the phloem.



## 75 RESULTS

### 76 mRNA patterns of specific cell types in maize leaves

77 To determine whether maize leaves contain multiple BSC types, we performed single-cell  
78 sequencing on protoplasts isolated from maize leaves. We first established a protocol for protoplast  
79 release. To minimize the possibility of a developmental gradient across cells, fully differentiated  
80 tissue was harvested from the distal portion of leaf 2 of late V2 stage plants (first and second leaf  
81 collar exposed) (Li et al., 2010) (Fig. 1a). Standard leaf protoplasting protocols leave intact bundle  
82 sheath ‘strands,’ consisting of BSCs and the vasculature (Kanai and Edwards, 1973; Langdale et  
83 al., 1989). In a parallel study, we were able to optimize protoplasting of Arabidopsis leaves to  
84 increase the yield of vascular cell types (Kim et al., 2020). We compared published protocols and  
85 varied parameters such as incubation time, enzyme concentration, enzyme blend, and preincubation  
86 in L-cysteine (Ortiz-Ramírez et al., 2018). Efficiency of the release of putative vascular cells was  
87 monitored using qRT-PCR with cell-type specific markers, under the assumption that the *SWEET13*  
88 paralogs, analogous to their Arabidopsis orthologs, would be specific to phloem parenchyma.  
89 Although none of the protocols were able to yield efficient release of putative vascular cells, we  
90 obtained apparent release of both BSCs and vascular cells with Protocol 4 (Supplementary Fig. 1).  
91 An estimated 7,000 protoplasts were pipetted into a 10x Chromium microfluidic chip, and single  
92 cell cDNA libraries were generated and sequenced. Gel bead-specific barcodes were used to  
93 identify mRNAs present in specific cells. After filtering the dataset to select for healthy cells, 4,035  
94 cells with an average of 4,874 mRNA molecules per cell were analyzed. Unsupervised clustering  
95 was performed using Seurat (Butler et al., 2018) to determine the relationship between mRNA  
96 expression profiles in PCA space, ultimately represented in a two-dimensional UMAP plot (Fig.  
97 1b). Cell identities were assigned to the clusters based on established marker genes for different  
98 cell types (Supplementary Table 1). We obtained six clusters, five of which formed a large  
99 supercluster that all had mesophyll identities, and one separate cluster corresponding to bundle

100 sheath identity (Fig. 1c). The distribution of marker genes was consistent with the roles of  
101 mesophyll and BS cells in C4 photosynthesis (Supplementary Fig. 2, Supplementary Table 2). The  
102 ratio of mesophyll to BSC was ~75:1, indicating a low efficiency of BSC retrieval. To our surprise,  
103 no vascular cells were recovered. The BS cluster was further divided into two subclusters, the  
104 “upper” and “lower” subclusters, which later were assigned as abaxial (<sup>ab</sup>BS) and adaxial (<sup>ad</sup>BS)  
105 bundle sheath cells (Fig. 1d, Fig. 2) (see below).

### 106 **Mesophyll and bundle sheath clusters show canonical expression of C4 photosynthesis genes**

107 Unsupervised clustering resulted in five clusters of mesophyll cells based on the presence of  
108 canonical C4 marker genes. At first sight the presence of five clusters was surprising. Cluster MS1  
109 included most mesophyll cells and likely represents the core mesophyll. MS1 was enriched in  
110 photosynthetic processes. MS2 was enriched for the GO terms triose phosphate transport  
111 (GO:0035436; GO:0015717), nucleic acid metabolic process, immune system process  
112 (GO:0002376) and RNA metabolic process (GO:0016070) (Supplementary Table 1, 3). MS3 and  
113 MS4 contained high levels of rRNA transcripts. rRNA was not removed before sample preparation  
114 nor were cells with higher rRNA transcript levels, as rRNA levels can vary between cells. Whether  
115 these rRNA-enriched clusters represent biologically relevant cell populations in the leaf or are due  
116 to artifacts was not further evaluated. An additional subcluster, MS5, had an apparent mesophyll  
117 identity, but was clearly separated from the other mesophyll clusters. The main determinants for  
118 this separate clustering were iron/metal-related processes (Supplementary Text). Due to the focus  
119 on BSCs, localization and biological relevance of MS5 was not characterized further. Our  
120 clustering data are supported by the presence of transcripts for the glutamine synthetase  
121 *GLN4* (corresponding to *gln1-3* and protein GS1-3) in the MS1-4 cells, consistent with previous *in*  
122 *situ* and immunolocalization data that detected glutamine synthetase specifically in the mesophyll  
123 (Supplementary Fig. 3) (Martin et al., 2006).

124 It may be interesting to explore further whether the subclustering of mesophyll cells represents  
125 developmental trajectories or physiological differences. We did not identify an obvious pattern that  
126 could be attributed to, for example, dorsoventral patterning due to developmental gradients or due  
127 to changes in light properties as it passes through the leaf. Similar observations regarding the  
128 presence of multiple mesophyll clusters were made for scRNA-seq analyses of Arabidopsis leaves,  
129 however, it was not possible to assign palisade and spongy parenchyma to any of the mesophyll  
130 clusters (Kim et al., 2020).

### 131 **Both subsets of bundle sheath cells express canonical C4 photosynthesis genes**

132 In maize, photosynthesis is partitioned between the mesophyll and bundle sheath cells (Li et al.,  
133 2010; Chang et al., 2012; Friso et al., 2010), allowing us to differentiate between these cell  
134 populations based on their mRNA profiles. Maize leaves utilize an NADP-ME-dependent C4  
135 pathway, and mesophyll cells and bundle sheath cells must exchange intermediate species via  
136 plasmodesmata, with specific enzymes highly upregulated in one cell type or the other. To identify  
137 the clusters, we selected several key marker genes that are known to be differentially expressed in  
138 either mesophyll or bundle sheath.

139 Most of the genes involved in primary carbon metabolism, which showed significant differential  
140 expression in the 2010 proteomics survey of MS and BS chloroplasts (Friso et al., 2010), were  
141 expressed in the expected cell types in our dataset (Supplementary Fig. 2, Supplementary Table 1,  
142 2), except for the predicted chloroplast envelope transporter *TPT* and the Calvin cycle enzyme  
143 *PGK2*, which were both expressed nearly equally in both MS and BS clusters. For example,  
144 transcripts of pyruvate orthophosphate dikinase 2 (*PDK2*) were almost exclusively found in BSCs,  
145 while *PDK1* transcript levels were high in mesophyll (Supplementary Fig. 2, Supplementary Table  
146 1, 2), in agreement with both proteomics data (Friso et al., 2010) and their corresponding  
147 contributions to C4 photosynthesis (Chastain et al., 2017). All cells in the BSC subcluster showed  
148 high and specific expression of the canonical C4 photosynthesis-related genes that function in the

149 BSCs, including *RBCS*, *ME1*, and *PCK1* (Supplementary Fig. 2, Supplementary Table 2). The  
150 Rubisco small chain mRNAs (*RBCS1*, *RBCS2*) were equally distributed in both abaxial and adaxial  
151 BS subclusters (Fig. 1). The bundle sheath-specific glutamine synthetase *GLN3* (corresponding to  
152 gene *gln1-4* and protein GS1-4) was found in both BS subclusters, consistent with *in situ* and  
153 immunolocalization data that showed no evidence for a specific pattern for GS1-4 in the BS  
154 (Supplementary Fig. 3) (Martin et al., 2006).

### 155 **Abaxial BS cluster is enriched for genes encoding transport proteins**

156 The two BS cell subclusters (Fig. 1d) could either represent developmental trajectories along the  
157 leaf axis, BS cells from the three different vein classes (major vein or rank-1 or rank-2 intermediate  
158 veins), different physiological states, or dorsoventral patterning. While the majority of mRNAs  
159 corresponded to BS identity, only 5 genes appeared specific to <sup>ad</sup>BS (the “lower subcluster”) and  
160 39 to <sup>ab</sup>BS (the “upper” subcluster) (Table 1). Surprisingly, among the genes with the highest  
161 difference between the two BS subclusters were the three *SWEET13a*, *b*, and *c* paralogs. SWEETs  
162 are uniporters, and maize *SWEET13a*, *b* and *c* function as sucrose transporters.

163 Similar to their orthologs *AtSWEET11* and *12* from Arabidopsis, in maize leaves *SWEET13a*, *b*,  
164 and *c* are critical for phloem loading of sucrose (Bezruczyk et al., 2018), though it remained  
165 unknown if the maize *SWEET13s* were co-expressed in the same cells and in which cell types they  
166 function. All three *SWEET13* paralogs were present in BSCs in maize, while the Arabidopsis  
167 orthologs *AtSWEET11*, *12* and *13* are specifically expressed in PP (Kim et al., 2020). This  
168 observation is consistent with the qRT-PCR results performed during the optimization of the  
169 protoplast protocol, which detected *SWEET13* transcripts, but no vascular cells were recovered by  
170 scRNA-seq. The “upper” BS subcluster, <sup>ab</sup>BS, showed a striking enrichment for transport proteins,  
171 with 9 of 39 <sup>ab</sup>BS-specific genes involved in transport (Table 1). Importantly, this included not only  
172 *SWEET13a*, *b*, and *c*, but also an STP hexose transporter (*STP3*), the amino acid efflux transporter  
173 *UmamiTT21a* (Supplementary Fig. 4), two members of the H<sup>+</sup>/amino acid symporter family,

174 *AAP56* and *AAP45* (Deng, 2014), a member of the nitrate peptide transport family, and the H<sup>+</sup>-  
175 ATPase *AHA3* (Table 1). Notably, in Arabidopsis, transcripts for the closest Arabidopsis homolog  
176 of *ZmUmamiT21a*, *AtUmamiT21*, were enriched in PP (Fig. 3) and co-expressed with *AtSWEET11*  
177 and *12* in Arabidopsis. On the basis of the presence of SWEETs, UmamiT21 and other <sup>ab</sup>BS-  
178 enriched candidates, one may speculate that the transcription factors that in Arabidopsis are  
179 involved in PP identity have been recruited in maize to <sup>ab</sup>BS to drive the unique set of genes  
180 expressed in <sup>ab</sup>BS. *DOF3* (*DNA binding with one finger3*) is a transcription factor implicated in the  
181 control of SWEET gene expression in rice (Wu et al., 2018) which shows <sup>ab</sup>BS-specific expression  
182 in this dataset; two other transcription factors, *bZIP4* (*ABA-insensitive 5-like protein*) and *MYB25*  
183 (just below p-value cutoff), were enriched in <sup>ab</sup>BS. While <sup>ab</sup>BS-enriched, *bZIP* and *MYB25* were  
184 not BS-specific, but only sparsely expressed in mesophyll cells (Supplementary Figure 3).

185 Other BSC-specific genes such as *RBCS1* showed equal transcript distribution across all BS cells,  
186 excluding the possibility of an artefact, e.g., a gradient of cells differing in UMI counts. This  
187 included *UmamiT20a*, which was BS-enriched but equally expressed across both BS subclusters.  
188 The lack of specificity of many genes for subsets of BSC is consistent with published data from *in*  
189 *situ* hybridization and immunolocalization of *RBCS1* and glutamine synthetase, both of which did  
190 not show dorsoventral patterning (Langdale et al., 1988a; Martin et al., 2006; Langdale et al.,  
191 1988b).

192 To test the hypothesis that the two BS subclusters may represent spatially discrete BSC populations,  
193 *in situ* hybridization was used to localize the mRNAs of the *SWEET13a*, *b*, and *c* genes (Fig. 2b-f,  
194 Supplementary Fig. 5). Notably, transcripts of all three *SWEET13* genes were specifically detected  
195 in the two abaxial bundle sheath cells (<sup>ab</sup>BSCs) adjacent to the phloem. Additionally, *SWEET13a*,  
196 *b*, and *c* transcripts localized to the PP (Fig. 2c, Supplementary Fig. 5) similar to *AtSWEET11*, *12*,  
197 and *13* (Kim et al., 2020; Chen et al., 2012). Using three independent sets of probes, transcripts of  
198 all three SWEET13s were almost exclusively found in the <sup>ab</sup>BS of rank-2 intermediate veins, which

199 are a special adaptation of C4 monocots (Langdale et al., 1988a) and serve as the main sites of  
200 phloem loading (Fritz et al., 1989, 1983). *SWEET13a* was detected in both <sup>ab</sup>BS and PP in about  
201 23% of the rank-2 intermediate veins. Thus, in the veins that are the main loading sites, sucrose  
202 efflux towards the SE/CC for phloem loading must occur predominantly from the <sup>ab</sup>BS into the  
203 apoplasm towards the phloem, and only to a smaller extent by direct release at the SE/CC from PP.  
204 Rank-1 intermediate veins seemed to have a more balanced distribution of *SWEET13a* between  
205 <sup>ab</sup>BS and PP. In major veins, SWEET13 transcripts were also present in the medial vascular  
206 parenchyma, and the main path appeared to be through release from PP.

207 Since protein abundance does not always correlate with mRNA levels (Walley et al., 2016), we  
208 evaluated the cell specificity of the SWEET13a protein. Maize lines were generated that stably  
209 expressed translational GUS reporter fusions (*SWEET13a-GUS*) comprising 6 kb upstream of the  
210 ATG and all exons and introns. Six transgenic lines from three independent transformation events  
211 showed consistent localization of the SWEET13a-GUS fusion protein in the <sup>ab</sup>BS and phloem  
212 parenchyma of rank-1 and -2 intermediate veins, and in the PP of the major veins (Fig. 4;  
213 Supplementary Fig. 5). In summary, *in situ* hybridization and immunolocalization showed that  
214 *SWEET13a, b, and c* transcripts and SWEET13a protein were not only found in the PP of maize,  
215 but also in a subset of BSCs, specifically the <sup>ab</sup>BS. This is different from the cellular expression of  
216 their orthologs in the dicot *Arabidopsis*, suggesting that an additional sucrose phloem loading  
217 pathway evolved in C4 monocots (Langdale et al., 1988a).

#### 218 ***SWEET13a- c* and *SUT1* sucrose transporters are expressed in complementary cell types**

219 Sucrose released from cells by SWEETs is taken up actively into the SE/CC by SUT1 H<sup>+</sup>/sucrose  
220 symporters (Riesmeier et al., 1994; Bürkle et al., 1998; Gottwald et al., 2000; Slewinski et al.,  
221 2009). To directly compare SWEET13 and SUT localization, *in situ* hybridization was performed  
222 in parallel using the same method from leaves at the same stages of development. *SUT1* RNA was  
223 typically found in one or two cells in the phloem, which most likely represent companion cells,

224 where it is responsible for phloem loading. In rank-1 and major veins, *SUTI* mRNA was also  
225 detected in the medial vascular parenchyma, where it likely contributes to sucrose retrieval (Heyser  
226 et al., 1977). In our experiments, *SUTI* transcripts were not detected in bundle sheath cells,  
227 consistent with *SUTI* expression below the detection limit in of our BSC single cell dataset (Fig.  
228 2g-h; Supplementary Fig. 5).

### 229 **Abaxial BS transcripts are co-regulated during the sink-source transition**

230 In Arabidopsis, many PP-specific genes were found to also be co-regulated (Kim et al., 2020). We  
231 therefore tested whether several of the transporter genes identified in <sup>ab</sup>BS might also be co-  
232 regulated. *SUTI* H<sup>+</sup>/sucrose symporter genes are typically lowly expressed in young net-importing  
233 leaves and induced during the sink to source transition (Bürkle et al., 1998; Riesmeier et al., 1993).  
234 RNA was extracted from different segments of leaf 3 of V2 plants, in which the tip had transitioned  
235 to source while the base was still in the sink state (Tausta et al., 2014) (Fig. 5a) for qRT-PCR.  
236 *SWEET13a*, and *UmamiT21*, *AAP45*, and *SUTI* had transcript levels that were 115-, 34-, 23-, and  
237 10-fold higher, respectively, than in the tip of leaf 3 (source) compared to the base (sink) (Fig. 5a,  
238 b). *SWEET13a* protein levels were also higher in source regions of the leaf (Fig. 5c). *SWEET13a*  
239 was not detected in stem sections near the base of the plant, which contain whorls of developing  
240 leaves, nor in root tip (Fig. 5d-f). In leaves, *SWEET13a* protein was not detectable in tissue other  
241 than the tip of leaf 3, consistent with its role in phloem loading in source leaves The co-regulation  
242 of <sup>ab</sup>BS-enriched genes during the developmental transition of leaves not only links them to transfer  
243 of nutrients to the phloem, but also indicates that they are all controlled by the same regulatory  
244 system.

245

## 246 **DISCUSSION**

247 While single cell sequencing was successfully used to identify the transcriptomes of vascular cells  
248 in *Arabidopsis* (Kim et al., 2020), the suberin-lignin barrier surrounding the bundle sheath of maize  
249 leaves prevented access to vascular cell transcriptomes in maize. With an optimized protocol, BSC  
250 were released and could be identified based on a broad range of known marker genes. BSC  
251 separated into two subclusters. mRNA for BSC markers such as *RBCS* and *GS1-4* were present at  
252 equal levels in both subclusters, whereas others were specifically enriched in one of the two  
253 subclusters. Because only moderately and highly expressed mRNAs are captured with droplet-  
254 based scRNA-seq protocols such as 10x Chromium, we cannot exclude that transcripts that appear  
255 to be specific are present at lower levels in the other cell types. A major surprise was the finding  
256 that mRNA for all three *SWEET13* paralogs was present in BSCs, in clear contrast to the  
257 distribution of their orthologs in *Arabidopsis* (Chen et al., 2012). Since barley BSCs seem clearly  
258 differentiated, with S-type cells suspected to represent a preferential site of sucrose transfer into  
259 the phloem (Williams et al., 1989), we tested whether *SWEET13a*, *b*, and *c* mRNA would be present  
260 in adaxial and lateral BSCs. To our surprise, *in situ* hybridization and the analysis of translational  
261 GUS fusions showed that all three *SWEET13*s were preferentially expressed in the <sup>ab</sup>BS cells of  
262 rank-2 intermediate veins, which are considered the main sites of phloem loading in maize. In  
263 maize, these two abaxial BSCs are smaller compared to the medial BSCs (Bosabalidis et al., 1994).  
264 In rank-2 intermediate veins of maize, it appears that the <sup>ab</sup>BS cells may have recruited sucrose-  
265 transporting *SWEETs* to export sucrose toward the abaxially localized phloem (Fig. 6). This  
266 presents a unique pathway, in which BSCs likely export photosynthetically derived sucrose to the  
267 apoplasm of the phloem on the abaxial side of the leaf. Rank-2 veins are thought to be an emergent  
268 phenomenon of C4 grasses (Sedelnikova et al., 2018). Rank-2 veins increase the ratio of BS to MS  
269 cells, the vein density, and the capacity for nutrient transport. They appear to be the main path for



270 sucrose phloem loading. It is thus conceivable that the unique phloem loading pathway coevolved  
271 with the evolution of the rank-2 intermediate veins.

272 Given the findings of Williams *et al* (Williams et al., 1989), which indicate that barley uses adaxial  
273 and medial BSCs for phloem loading, our results suggest that the two species use distinct sets of  
274 BSCs for transferring sucrose from the BS to the phloem. This may be generalizable to other C3  
275 and C4 species, and it will be interesting to explore whether *SWEETs* are also present in medial  
276 BSCs of barley. <sup>ab</sup>BS and <sup>ad</sup>BS transcript profiles are highly similar, possibly explaining why this  
277 differentiation of BSCs had previously not been identified.

278 In rank-1 intermediate and major veins, *SWEET13a*, *b* and *c* transcripts were also detected in cells  
279 in the vasculature that most likely correspond to phloem parenchyma, thus similar to the canonical  
280 pathway in Arabidopsis (Chen et al., 2012; Cayla et al., 2019). Phylogenetic and functional analyses  
281 had shown that the PP transporters AtSWEET11 and 12 from Arabidopsis are orthologous to the  
282 three SWEET13 isoforms (Bezruczyk et al., 2018). Subsequent to SWEET-mediated efflux,  
283 sucrose is taken up actively by SUT1/SUC2 H<sup>+</sup>/sucrose symporters in both maize and Arabidopsis  
284 (Gottwald et al., 2000; Slewinski et al., 2009). This is supported by *in situ* hybridization of *SUT1*  
285 in maize leaves (Supplementary Fig. 5). PP localization of *SUT1* is consistent with previously  
286 published results (Baker et al., 2016). We could not confirm previous data that indicated that SUT1  
287 may also be expressed substantially in BSCs (Supplementary Fig. 5). Localization of *SUT1* in  
288 vascular parenchyma (VP) is consistent with a role in sucrose retrieval on the side of the phloem  
289 that faces the xylem. Our data are compatible with the presence of two distinct sites for phloem  
290 efflux in maize leaves, one from <sup>ab</sup>BS and a more standard path from PP (Fig. 6). This unique  
291 pathway may be a specific adaptation of maize leaves in the context of C4 photosynthesis, to  
292 provide higher rates of sucrose flux towards the phloem. No doubt, *SWEET13a*, *b* and *c* are key  
293 players for phloem loading, though at present we cannot assess the relative contribution of this new  
294 efflux step. This model could be tested by inhibiting SWEET activity specifically either in BSC or

295 PP. However, since transcription factors driving expression of genes specifically in maize <sup>ab</sup>BS or  
296 PP are not currently known, this hypothesis could be tested by generation of lines in which  
297 *SWEET13* mRNA levels have been repressed through BSC-specific RNAi.

298 Notably, transcripts for other transporter genes were also enriched in <sup>ab</sup>BS. This includes  
299 UmamiT21a, a member of the UmamiT amino acid transporter family. One of the key findings  
300 from the analysis of PP in Arabidopsis by scRNA-seq was that multiple members of this family  
301 were specifically expressed in PP (Fig. 3, Table 1)(Kim et al., 2020). Since they appear to play  
302 roles analogous to that of SWEETs in cellular efflux of amino acids in Arabidopsis, it appears that  
303 <sup>ab</sup>BS, besides having clear BSC identity, has acquired components or subnetworks of the PP  
304 identity. The co-regulation of at least some of the <sup>ab</sup>BS-enriched genes further strengthens this  
305 hypothesis. Interestingly, we also observed a weak enrichment of the abaxial KANADI  
306 transcription factor (Fig. 2a). KANADI plays a key role in determining abaxial identity in leaves  
307 (Candela et al., 2008). We therefore hypothesize that one or several transcriptional regulators that  
308 are involved in the regulation of the efflux of sucrose and amino acids from PP have been brought  
309 under control of both a polarity cue and the BS identity cues in order to increase nutrient flux  
310 towards the maize phloem. It will be fascinating to identify the transcription factors that are  
311 involved in controlling the PP and BSC identities and to dissect the SWEET promoters to determine  
312 which *cis*-elements are involved in the acquisition of the <sup>ab</sup>BS cell fate. Several transcriptional  
313 regulators have been identified as candidates for the induction of <sup>ab</sup>BS cell fate; however, the  
314 limitations of sequencing depth in 10x Genomics Chromium droplet-based scRNA-seq preclude a  
315 comprehensive profiling of all transcriptional regulators. Methods that provide higher sensitivity  
316 may help to address this aspect. Importantly, the <sup>ab</sup>BS genes identified provide unique insight into  
317 the specialized nature of this cell type.

318 Comparison of this phenomenon in other grasses, those that use both C3 and C4 photosynthesis, as  
319 well as a careful analysis of the evolution of rank-2 intermediate veins may provide insights into

320 how widely distributed this mechanism is and may provide hints regarding the evolution of this  
321 regulatory rearrangement. Finally, new methods will be required to gain access to the vascular cells  
322 of maize, which are not accessible through the current methods. In summary, scRNA-seq enabled  
323 the identification of cells with a unique combination of properties on the adaxial side of the bundle  
324 sheath, cells that play key roles in C4 photosynthesis. The identification of this new property may  
325 be relevant to bioengineering of staple crops, for example, C4 rice.

326

### 327 **Materials Availability**

328 Plasmids generated in this study have been deposited to Addgene under the code Plasmid #159535.

329

### 330 **Data and Code Availability**

331 The raw data that support the findings of this study are available from the corresponding author  
332 upon reasonable request. All sequencing data will be deposited in the Gene Expression Omnibus  
333 GEO ([www.ncbi.nlm.nih.gov/geo/](http://www.ncbi.nlm.nih.gov/geo/)) and the accession number will be updated here.

334

## 335 **METHOD DETAILS**

### 336 **Plant growth.**

337 *Zea mays* L. B73 seeds were germinated on filter paper with deionized, distilled water in darkness  
338 at 22-25 °C and transferred to soil upon coleoptile emergence. Plants were subsequently grown at  
339 28-30 °C in a greenhouse supplemented by sodium lamps (400  $\mu\text{mol m}^{-2} \text{s}^{-1}$ ) from 8:00-20:00.  
340 Protoplasts for scRNA-seq were generated from the last 6 cm of the distal portion of V2 leaf 2. For  
341 each pool of protoplasts tested, leaf segments from six concurrently grown plants were used. *In situ*  
342 hybridization was performed on sections taken from the distal portion of leaf 2 of V2 plants, distal  
343 portion of leaf 5 of V4 plants, and distal portion of the flag leaf from VT plants, with similar results.  
344 All images shown are from V4 leaf 5. For GUS staining, tissue segments were taken 10 cm from

345 the tip of the third leaf below the flag leaf of T0 plants at growth stage VT (mature leaf tip), 4 cm  
346 from the tip of leaf 3 of T1 V2 plants (seedling leaf tip), 12 cm from the tip of T1 V2 plants (seedling  
347 leaf base), a stem section 1 cm above soil surface of T1 V2 plant (seedling stem), or the seminal  
348 root tip from T1 V2 plant (seedling root).

349 **Genes analyzed here.**

350 Gene IDs are provided as Supplementary Table 4.

351 **Probe preparation for *in situ* hybridization.**

352 RNA was extracted from leaves of V2 B73 seedlings by phenol-chloroform extraction as previously  
353 described (Bezruczyk et al., 2018). cDNA synthesis was performed using QuantiTect Reverse  
354 Transcription Kit (Qiagen, Hilden, Germany). cDNA was amplified for each gene (Supplementary  
355 Table 5) using Takara PrimeSTAR GXL polymerase then subcloned into pJET1.2 using CloneJet  
356 PCR cloning kit (ThermoFisher, Meerbusch, Germany). For *SWEET13a*, *b*, and *c*, three unique  
357 regions in the 5'- and 3'-UTRs and in the coding region with lengths of ~100 bp were selected as  
358 probe templates. The three probes specific for one of the genes were combined for detection of the  
359 respective target gene. For *SUT1*, two regions in the 5'- and 3'-UTRs, unique to *SUT1* but common  
360 to all six isoforms, were selected as probe templates. All cDNA sequence alignments were  
361 performed using Geneious R11 (<https://www.geneious.com>) (Supplementary Fig. 6). Probe  
362 template regions were amplified with SP6 sequences flanking the forward primers for the sense  
363 probe, and reverse primers for antisense probes (Supplementary Table 5). The MEGAscript SP6  
364 Transcription kit (ThermoFisher) was used with a 1:2 ratio of DIG-labelled UTP:UTP to generate  
365 DIG-labelled probes. Probes were precipitated after DNase reaction by addition of 2 mg/mL  
366 glycogen, 0.1 volume 10% acetic acid, 0.1 volume NaOAc, and 2.5 volumes ethanol and  
367 centrifuged at 4 °C at 20,000 x g for 30 min. Pellets were washed with 70% ethanol in DEPC-  
368 treated water, allowed to dry, and resuspended in 25 µL RNase-free 10 mM Tris-EDTA pH 8 and  
369 25 µL formamide.

370 ***In situ* hybridization.**

371 *In situ* hybridization was adapted from Jackson and Simon lab protocols (Jackson, 1992; Stahl and  
372 Simon, 2010). Leaf tip sections 1 cm in length were dissected from V2 or V5 plants into 4%  
373 paraformaldehyde, vacuum-infiltrated for 10 min and fixed overnight at 4 °C. Dehydration by  
374 ethanol series and paraplast embedding were performed as described (Malcomber and Kellogg,  
375 2004). Sections (10 µm) were cut with a Leica RM 2155 microtome and mounted on ProbeOn Plus  
376 slides (Fisher). After deparaffinization with HistoClear and rehydration by a decreasing ethanol  
377 series, tissue was permeabilized in a 2 µg/mL proteinase K solution, washed with 0.2% glycine and  
378 1x PBS (1.3 M NaCl, 0.07 M Na<sub>2</sub>HPO<sub>4</sub>, 0.03 M NaH<sub>2</sub>PO<sub>4</sub>) for 2 min, and re-fixed with 4%  
379 paraformaldehyde for 10 min. Slides were washed with PBS and acetylated with 0.1 M  
380 triethanolamine and acetic anhydride for 10 min, then washed and dehydrated with an increasing  
381 ethanol series. Probes for each construct were mixed (e.g. all three antisense probes for  
382 *SWEET13a*), diluted 1:50 with formamide, denatured at 95 °C for 3 min, and further diluted 1:4  
383 with hybridization buffer (300 mM NaCl, 10mM NaH<sub>2</sub>PO<sub>4</sub>, 10mM Na<sub>2</sub>HPO<sub>4</sub>, 10mM Tris-Cl pH  
384 6.8, 5 mM EDTA, 50% formamide, 12.5% dextran sulfate, 1.25mg/mL tRNA). Probe incubation  
385 in slide pairs was performed at 55 °C overnight. Slides were rinsed three times with 0.2x SSC pH  
386 7 (600 mM NaCl, 60 mM sodium citrate) at 55 °C for one hour, and washed with block reagent  
387 solution (Roche), washed with BSA blocking solution (10 mg/mL BSA, 0.1 M Tris-Cl, 150 mL  
388 NaCl, 0.3% Triton X-100) for 45 min, and incubated with anti-DIG antibody (Roche) for 2 hours  
389 at 22 °C. Slides were rinsed four times with BSA block solution for 15 min each, in Buffer C (100  
390 mM Tris pH 9.5, 50 mM MgCl<sub>2</sub>, 100 mM NaCl) for 15 minutes, and incubated with 50 µL NBT  
391 and 37.5 µL BCIP in 5 mL buffer C for 24-48 hours. Slides were washed with water, dehydrated  
392 with an increasing ethanol series, and mounted with Eukitt Quick-hardening mounting medium.  
393 Images were taken with an Olympus CKX53 cell culture microscope with EP50 camera. *In situ*

394 hybridization experiments for each gene (probe combination) were performed as (at minimum)  
395 three independent experiments.

#### 396 **Generation of ZmSWEET13-GUS constructs.**

397 *ZmSWEET13a* (Supplementary Table 4), including 5751 bp upstream of the start codon and 684  
398 bp downstream of the stop codon, was isolated from B73 gDNA (Supplementary Table 5) and  
399 inserted into pJET using the CloneJET PCR cloning kit. The final construct consists of GUSplus  
400 inserted directly upstream of the *ZmSWEET13a* stop codon, preceded by a 9-alanine linker, in the  
401 Golden Gate vector pGGBb-AG, the *in silico* cloning of which was performed using Geneious R11  
402 (Supplementary Fig. 6). The assembly of all fragments with the vector pGGBb-AG was performed  
403 using the Takara InFusion HD cloning kit, and validated by Sanger sequencing.

404

#### 405 **Maize transformation.**

406 *Agrobacterium tumefaciens* strain EHA105 was transformed with the ZmSWEET13a:GUS vector  
407 at the Crop Genome Engineering Facility at VIB Ghent (<https://www.psb.ugent.be/cgef>).  
408 Transformed EHA105 carrying the respective plasmids was used to transform the inbred maize line  
409 B104 via *Agrobacterium*-mediated transformation of 600 immature embryos according to  
410 previously described methods (Coussens et al., 2012). In brief, callus formation was induced using  
411 auxins and transgenic cells selected over several weeks using phosphinotricin (PPT) selection.  
412 Plantlets were then regenerated on hormone-free medium, and presence of the transgene confirmed  
413 using TraitCheck (Romer Labs; Butzbach, Germany) and PCR analysis. Three independent  
414 transformation events were derived from different starting immature embryos, yielding six plants  
415 in total: three plants from event A (pSWEET13a:SWEET13a:GUSplus<sup>a</sup>), two from event B  
416 (pSWEET13a:SWEET13a:GUSplus<sup>b</sup>), and one from event C  
417 (pSWEET13a:SWEET13a:GUSplus<sup>c</sup>).

418 **GUS histochemistry.**

419 Tissue segments were taken 10 cm from the tip of the third leaf below the flag leaf of T0 plants at  
420 growth stage VT (mature leaf tip), 4 cm from the tip of leaf 3 of T1 V2 plants (seedling leaf tip),  
421 12 cm from the tip of T1 V2 plants (seedling leaf base), on the stem 1 cm above the soil surface of  
422 T1 V2 plant (seedling stem), or from the seminal root tip of T1 V2 plant (seedling root) at 13:00  
423 o'clock. Tissue segments were dissected into cold acetone and vacuum-infiltrated for two min,  
424 vacuum infiltrated with GUS wash buffer (20 mM EDTA, 40 mM  $C_6N_6FeK_3$ , 40 mM  $C_6FeK_4N_6$ ,  
425 20% methanol, 57.6 mM  $Na_2HPO_4$ , 42 mM  $NaH_2PO_4$ , 0.1% Triton X-100), and incubated with  
426 GUS wash buffer including 0.2% X-Gluc at 37°C for 1-48 hours. Sections were dehydrated in 20%,  
427 30%, 50% ethanol for 30 min, fixed in FAA (50% ethanol, 3.7% formaldehyde, 5% acetic acid) for  
428 30 min, and further dehydrated in 75% and 100% ethanol. Embedding was performed by incubating  
429 sections at 60 °C in tert-butyl ethanol:paraplast dilutions at 3:1, 1:1, and 1:3 ratios. Melted paraplast  
430 (100%) was changed twice daily for three days. Paraplast-embedded tissue was poured into blocks,  
431 and 10- $\mu$ m sections were cut with a Leica RM 2155 microtome. Sections were mounted on  
432 SUPERFROST PLUS Gold Slides (Thermo Scientific), deparaffinized with HistoClear, and  
433 mounted with Eukitt Quick-hardening mounting medium.

434 **Single cell sequencing: protoplast preparation.**

435 Tissue was sampled from the distal portion of leaf 2 (from 1 cm to 7 cm, as measured from the tip)  
436 from V2 plants. This region was selected because it is thought to be non-expanding, non-  
437 differentiating source tissue based on results from the RNAseq-defined developmental  
438 transcriptome of the maize leaf (Li et al., 2010). Leaf segments were harvested at 9:00 am, and tape  
439 was applied to adaxial epidermis to stabilize the tissue, which was scored every 5 mm from the  
440 midvein to leaf edge with a razor manifold consisting of scalpel blades taped together to ensure  
441 minimum distance between scores. Tape sections were placed abaxial-side down in pretreatment  
442 solution (2 mM L-cysteine, 164 mM sorbitol) and vacuum-infiltrated for 10 min with 2 min of

443 active pumping. Tape sections were incubated with gentle agitation (30 rpm, IKA Rocker 3D  
444 orbital shaker) for an additional 20 min in pre-treatment solution, then transferred to enzyme  
445 solution (cellulase "Onozuka" RS 1.25%, cellulase "Onozuka" R-10 1.25%, pectolyase Y-23 0.4%,  
446 macerozyme R-10 0.42%, sorbitol 0.4 M, MES 20 mM, KCL 20 mM, CaCl<sub>2</sub> 10 mM, BSA 0.1%,  
447 β-mercaptoethanol 0.06%) for 3.5 h with gentle agitation (30 rpm on orbital shaker). Protoplasts  
448 were filtered through a Corning 70-μm nylon mesh strainer and centrifuged in a round bottom tube  
449 for 1.5 min at 100 x g. Enzyme solution was gently removed and replaced with cold wash solution  
450 (sorbitol 0.4M, MES 20mM, KCl 20mM, CaCl<sub>2</sub> 10mM, BSA 0.1%). Protoplasts were carefully  
451 resuspended in wash solution and centrifuged for 30 seconds at 100 x g, then strained through a  
452 70-μm Scienceware Flowmi Cell Strainer to remove large debris. Washing solution steps were  
453 repeated four additional times to remove chloroplasts and small debris. Cell viability and  
454 concentration were quantified under an Olympus CKX53 cell culture microscope: 1 μL 0.4%  
455 Trypan blue was added to 9 μL of resuspended protoplasts in wash solution and pipetted into the  
456 chamber of a C-Chip Neubauer Improved Disposable Haemocytometer (NanoEntek; Seoul, South  
457 Korea); healthy (unstained) cells were counted. Protoplasts were resuspended to a concentration of  
458 1,200 cells /μL. A variety of approaches to degrade the suberin-lignin-containing bundle sheath  
459 cell walls with the addition of other enzymes failed to produce healthy cells: Laccase (Sigma) and  
460 manganese peroxidase (Sigma), as well as enzymes provided by Novozymes (Copenhagen,  
461 Denmark), namely a cutinase, a fungal carbohydrase blend produced in *Aspergillus aculeatus*, a  
462 fungal beta-glucanase blend produced in *Humicola insolens*, a pectinase preparation produced in  
463 *Aspergillus*, a xylanase blend, and a multi-enzyme complex containing carbohydrases, including  
464 arabanase, cellulase, beta-glucanase, hemicellulose and xylanase, were each added to the existing  
465 protocol to a final concentration of 1-2% active enzyme weight/vol. Visual inspection of protoplasts  
466 during isolation revealed that addition of these enzymes caused protoplasts to rupture.

#### 467 **Protoplast protocol optimization**



468 Several variations of the above protocol were tested prior to the final protoplast preparation, and  
469 the presence of diverse cell types was verified by qRT-PCR using primers specific to *MDH6*, *ME1*,  
470 *SWEET13a*, *SWEET13b*, and *SWEET13c* (Supplementary Table 5). Briefly, RNA was extracted  
471 from protoplasts using the RNEasy Mini Kit, and first strand cDNA was synthesized using  
472 Quantitect reverse transcription kit (Qiagen, Hilden, Germany). Quantitative reverse transcription  
473 PCR (qRT-PCR) was performed using Roche LightCycler 480 SYBR Green I Master polymerase  
474 on a Stratagene Mx3000P, and relative expression of transporter genes was calculated relative to  
475 18S and Actin using the  $2^{-\Delta CT}$  method. Modifications to the standard protoplast isolation protocol  
476 of 2 h in enzyme solution (see previous section) (Protocol 1) included doubling the concentration  
477 of enzymes in solution (Protocol 2), isolating BS strands released after 2 h followed by continued  
478 incubation of filtered BS strands in fresh enzyme solution to deplete mesophyll cells (Protocol 3),  
479 and incubating the leaf tissue in pretreatment solution (Protocol 4) (2 mM L-cysteine and 164 mM  
480 sorbitol). The protocol which yielded the highest ratio of BS:MS marker genes (*ME1*: *MDH6*)  
481 included a pretreatment incubation step and 1x enzyme solution (Supplementary Fig. 1).

#### 482 **Cell partitioning, library prep, and sequencing.**

483 To aim for partitioning of 7,000 cells, with the expectation that 3,500 cells would be sequenced, 6  
484  $\mu$ L of the protoplast suspension with an estimated 1,200 cells/ $\mu$ L was applied to the 10x Genomics  
485 Chromium microfluidic chip (Chemistry V3.0). Thereafter the standard manufacturer's protocol  
486 was followed. Twelve cycles were used for cDNA amplification, and the completed cDNA library  
487 was quantified using an Agilent AATI Fragment Analyzer. Sequencing was performed at  
488 Novogene (Sacramento, CA, USA) on a single lane with the Hi-Seq platform and the standard  
489 PE150 sequencing parameters.

#### 490 **Generation of single-cell expression matrices**

491 Cellranger count (10x Genomics) was used to process fastq files provided by Novogene, with  
492 read 1 trimmed to 26 bp ( $r1\text{-length}=26$ ), as the first 26 bp of a 10x library R1 comprise the cell

493 barcode and UMI index, and the remaining comprises poly-A tail with no further information. A  
494 formatted reference genome was generated using Cellranger mkref using the maize B73 RefGen  
495 4 (Jiao et al., 2017) whole genome sequence and annotation (fasta and gff3 downloaded from  
496 Ensembl B73 RefGen V4), to which reads were aligned using STAR (Dobin et al., 2013). For  
497 analysis of single cell sequencing data, see “Quantification and Statistical Analysis” section  
498 below.

#### 499 **Phylogeny of UmamiT transporters**

500 BLAST results from the seed sequence AtUmamiT12 (At2g37460) to maize (AGP v4 (Jiao et al.,  
501 2017) and barley (IBSC v2 (Mascher et al., 2017)) were combined with BioMart (Smedley et al.,  
502 2009) results and filtered for the WAT1-related protein domain (panther ID PTHR31218). Genes  
503 passing this filter were selected as UmamiT family candidate genes. Two trees were generated: one  
504 using an alignment of all known splice variants, and one with only the representative transcript,  
505 with similar results. Alignment was performed in MEGA7 (Kumar et al., 2016) using MUSCLE  
506 with the following parameters: gap open penalty -2.9, gap extend penalty 0, hydrophobicity  
507 multiplier 1.2, max iterations 8, clustering method UPGMA for iteration 1, 2; UPGMB for all  
508 subsequent iterations, and lambda 24. The maximum likelihood tree was created from these  
509 alignments using IQTREE webserver (Trifinopoulos et al., 2016) using the BLOSUM62  
510 substitution model and 1000 bootstraps.

511

## 512 **QUANTIFICATION AND STATISTICAL ANALYSIS**

513

### 514 **Sample selection for scRNA-Seq, qRT-PCR, and RNAseq**

515 Plants chosen for protoplast release, qPCR, and RNAseq were randomly selected from among a  
516 larger number of individuals which had been grown concurrently and were at the same growth  
517 stage. True biological replicates (i.e., independently grown plants) were used as replicates for

518 statistical analyses. The number of plants per sample and number of replicates is given in the Figure  
519 legends or in specific methods sections. To ensure reproducibility, the plants used in successive  
520 experiments were grown in the same greenhouse under controlled conditions. Samples for a given  
521 experiment were taken at the same developmental stage, at the same time of day.

522

### 523 **Dimensionality reduction and cell clustering**

524 The Seurat R package (v3.1)(Butler et al., 2018) was used for dimensionality reduction analysis  
525 and dataset filtering. To remove cells with low mRNA count (nFeature\_RNA) and doublets, as well  
526 as damaged cells with high chloroplast (pt) or mitochondria (mt) genome-derived transcripts, cells  
527 were filtered (percent.pt <4 & percent.mt <0.75 & nFeature\_RNA >1800 & nFeature\_RNA  
528 <7000). Normalization, scaling, and variable feature detection were performed using SCTransform  
529 (Hafemeister and Satija, 2019). Cells were clustered using FindNeighbors to create a K-nearest  
530 neighbors graph using the first 50 principle components. FindClusters was used to iteratively group  
531 cells using a resolution of 0.2 or 23. These clusters were used as input for non-linear dimensional  
532 reduction using Uniform Manifold Approximation and Projection (UMAP)(McInnes et al., 2018).

### 533 **Differential gene expression analysis across clusters**

534 Genes differentially expressed across clusters or subclusters were identified by comparing average  
535 normalized mRNA counts in cells of a given cluster to that of cells in all other clusters using the  
536 Seurat function FindMarkers. Genes with an FDR corrected P-value <0.05 and an average logFC  
537 >0.5 were considered marker genes.

### 538 **Identification of cluster identities**

539 Canonical C4 photosynthesis-related genes were used as markers to define MSC and BSC clusters  
540 (Denton et al., 2017) (Supplementary Table 1). The cluster identified as BSC was subdivided into  
541 two subclusters when FindClusters was applied with a resolution of 23, and differential gene

542 expression analysis was performed on these two subclusters with FindMarkers (for subclusters:  
543  $\log_{2}FC > 0.5$ ,  $FDR \leq 0.01$ ).

#### 544 **qRT-PCR of transporter genes in seedling leaf**

545 Leaf segments were harvested from the distal and proximal end (tip and base) of leaf 3 of early V2  
546 plants at 13:00. Tissue was ground in liquid nitrogen and RNA extracted as previously described  
547 (Bezruczyk et al., 2018). First strand cDNA was synthesized using Quantitect reverse transcription  
548 kit (Qiagen). qRT-PCR to determine relative mRNA levels was performed using a Stratagene  
549 Mx3000P with primers for *18S*, *Actin*, *SWEET13a*, *13b*, *13c*, *SUT1*, *UmamiT21a*, and *STP3*  
550 (Supplementary Table 5). Relative expression of transporter genes was calculated relative to *18S*  
551 and *Actin* using the  $2^{-\Delta CT}$  method for quantification, with similar results. Values shown in Figure  
552 5b are the average of three technical (qRT-PCR) replicates of three pools of two plants; error bars  
553 represent SEM. Students two-tailed paired t-test values are shown. Two independent repeats  
554 confirmed the data.

#### 555 **Gene Ontology term analysis for mesophyll clusters**

556 Marker genes for each of the five mesophyll clusters ( $\log_{2}FC > 0.5$ ; FDR-adjusted p-value  $< 0.05$ )  
557 were used as input for Gene Ontology (Ashburner et al., 2000; The Gene Ontology Consortium,  
558 2018) analysis via the online portal GO Gene Ontology database (doi: 10.5281/zenodo.3727280;  
559 released 2020-03-23). GO terms with FDR-corrected p-values  $< 0.05$  can be found in  
560 Supplementary Table 3.

#### 561 **Protoplast and bulk leaf tissue RNAseq**

562 Protoplasts were generated according to the previously described method. Whole leaf tissue from  
563 sibling plants was ground in liquid nitrogen at the time leaf tissue was harvested for protoplast  
564 isolation. RNA from two pools of protoplasts made from four leaves each (P1 and P2), and two  
565 pools of four whole leaf segments each (L1 and L2) was extracted using the RNEasy Mini Kit

566 (Qiagen), and four cDNA libraries were generated using the NEBNext Ultra DNA Library Prep Kit  
567 for Illumina (New England Biolabs, MA, USA) with modifications to select for 250-500 bp  
568 fragments. Sequencing of the four libraries was performed at Novogene (Sacramento, CA, USA)  
569 on a single lane with the Hi-Seq platform and the standard PE150 sequencing parameters. Reads  
570 were analyzed using a custom implementation of the Wyseq RNAseq analysis pipeline  
571 (<https://github.com/astauff/WySeq>). Briefly, reads were trimmed using TrimGalore (v 0.6.5) and  
572 aligned to the AGPv4 B73 reference genome using STAR (v 2.5.1b). Counts were generated using  
573 Subread featureCounts (v 2.0.1), and differential expression was analyzed using the R-packages  
574 EdgeR (v3.30.3) and limma (v 3.44.3) using trimmed mean M-value (TMM) normalization factors.  
575 Reads corresponding to BSC-specific genes and MS-specific genes were normalized separately to  
576 compensate for the expected difference in cell populations represented in protoplasts and whole  
577 leaf tissue. Genes were filtered to remove those with a coefficient of variation >75<sup>th</sup> percentile  
578 within replicate groups prior to correlation analysis. Pearson correlation (Supplementary Fig. 7)  
579 and differentially expressed genes specific to BS and MS-cells ( $\log_{2}FC > 1$  or  $< -1$ ) are presented  
580 (Supplementary Table 6). None of the genes in the <sup>ab</sup>BS subclusters were induced by protoplast  
581 isolation. Rather, several showed reduced mRNA levels in the protoplast sample.  
582  
583

584 REFERENCES

585

586 Ashburner, M. et al. (2000). Gene ontology: tool for the unification of biology. The  
587 Gene Ontology Consortium. *Nat. Genet.* **25**: 25–29.

588 Baker, R.F., Leach, K.A., Boyer, N.R., Swyers, M.J., Benitez-Alfonso, Y., Skopelitis,  
589 T., Luo, A., Sylvester, A., Jackson, D., and Braun, D.M. (2016). Sucrose  
590 transporter ZmSut1 expression and localization uncover new insights into sucrose  
591 phloem loading. *Plant Physiol.* **172**: 1876–1898.

592 Bezruczyk, M., Hartwig, T., Horschman, M., Char, S.N., Yang, J., Yang, B.,  
593 Frommer, W.B., and Sosso, D. (2018). Impaired phloem loading in  
594 *zmsweet13a,b,c* sucrose transporter triple knock-out mutants in *Zea mays*. *New*  
595 *Phytol.* **218**: 594–603.

596 Bosabalidis, A.M., Evert, R.F., and Russin, W.A. (1994). Ontogeny of the vascular  
597 bundles and contiguous tissues in the maize leaf blade. *Am. J. Bot.* **81**: 745–752.

598 Bürkle, L., Hibberd, J.M., Quick, W.P., Kühn, C., Hirner, B., and Frommer, W.B.  
599 (1998). The H<sup>+</sup>-sucrose cotransporter NtSUT1 is essential for sugar export from  
600 tobacco leaves. *Plant Physiol.* **118**: 59–68.

601 Butler, A., Hoffman, P., Smibert, P., Papalexi, E., and Satija, R. (2018). Integrating  
602 single-cell transcriptomic data across different conditions, technologies, and  
603 species. *Nat. Biotechnol.* **36**: 411–420.

604 Candela, H., Johnston, R., Gerhold, A., Foster, T., and Hake, S. (2008). The  
605 *milkweed pod1* gene encodes a KANADI protein that is required for  
606 abaxial/adaxial patterning in maize leaves. *Plant Cell* **20**: 2073.

607 Cayla, T., Le Hir, R., and Dinant, S. (2019). Live-cell imaging of fluorescently tagged  
608 phloem proteins with confocal microscopy. *Methods Mol. Biol. Clifton NJ* **2014**:  
609 95–108.

610 Chang, Y.-M., Liu, W.-Y., Shih, A.C.-C., Shen, M.-N., Lu, C.-H., Lu, M.-Y.J., Yang,  
611 H.-W., Wang, T.-Y., Chen, S.C.-C., Chen, S.M., Li, W.-H., and Ku, M.S.B.  
612 (2012). Characterizing regulatory and functional differentiation between maize  
613 mesophyll and bundle sheath cells by transcriptomic analysis. *Plant Physiol.* **160**:  
614 165.

615 Chastain, C.J., Baird, L.M., Walker, M.T., Bergman, C.C., Novbatova, G.T.,  
616 Mamani-Quispe, C.S., and Burnell, J.N. (2017). Maize leaf PPK regulatory  
617 protein isoform-2 is specific to bundle sheath chloroplasts and paradoxically lacks  
618 a Pi-dependent PPK activation activity. *J. Exp. Bot.* **69**: 1171–1181.

619 Chen, L.Q., Qu, X.Q., Hou, B.H., Sosso, D., Osorio, S., Fernie, A.R., and Frommer,  
620 W.B. (2012). Sucrose efflux mediated by SWEET proteins as a key step for  
621 phloem transport. *Science* **335**: 207–11.

- 622 **Coussens, G., Aesaert, S., Verelst, W., Demeulenaere, M., De Buck, S., Njuguna, E.,**  
623 **Inzé, D., and Van Lijsebettens, M.** (2012). *Brachypodium distachyon* promoters  
624 as efficient building blocks for transgenic research in maize. *J. Exp. Bot.* **63**:  
625 4263–4273.
- 626 **Deng, L.** (2014). A Genome-Wide Analysis of the AAP Gene Family in Maize. *J.*  
627 *Proteomics Bioinform.* **07**.
- 628 **Denton, A.K., Maß, J., Külahoglu, C., Lercher, M.J., Bräutigam, A., and Weber,**  
629 **A.P.M.** (2017). Freeze-quenched maize mesophyll and bundle sheath separation  
630 uncovers bias in previous tissue-specific RNA-Seq data. *J. Exp. Bot.* **68**: 147–160.
- 631 **Dobin, A., Davis, C.A., Schlesinger, F., Drenkow, J., Zaleski, C., Jha, S., Batut, P.,**  
632 **Chaisson, M., and Gingeras, T.R.** (2013). STAR: ultrafast universal RNA-seq  
633 aligner. *Bioinformatics* **29**: 15–21.
- 634 **Friso, G., Majeran, W., Huang, M., Sun, Q., and van Wijk, K.J.** (2010).  
635 Reconstruction of metabolic pathways, protein expression, and homeostasis  
636 machineries across maize bundle sheath and mesophyll chloroplasts: large-scale  
637 quantitative proteomics using the first maize genome assembly. *Plant Physiol.*  
638 **152**: 1219.
- 639 **Fritz, E., Evert, R.F., and Heyser, W.** (1983). Microautoradiographic studies of phloem  
640 loading and transport in the leaf of *Zea mays* L. *Planta* **159**: 193–206.
- 641 **Fritz, E., Evert, R.F., and Nasse, H.** (1989). Loading and transport of assimilates in  
642 different maize leaf bundles. *Planta* **178**: 1–9.
- 643 **The Gene Ontology Consortium** (2018). The Gene Ontology Resource: 20 years and  
644 still GOing strong. *Nucleic Acids Res.* **47**: D330–D338.
- 645 **Gottwald, J.R., Krysan, P.J., Young, J.C., Evert, R.F., and Sussman, M.R.** (2000).  
646 Genetic evidence for the *in planta* role of phloem-specific plasma membrane  
647 sucrose transporters. *Proc. Natl. Acad. Sci.* **97**: 13979.
- 648 **Hafemeister, C. and Satija, R.** (2019). Normalization and variance stabilization of  
649 single-cell RNA-seq data using regularized negative binomial regression. *Genome*  
650 *Biol.* **20**: 296.
- 651 **Henderson, D.C., Zhang, X., Brooks III, L., and Scanlon, M.J.** (2006). RAGGED  
652 SEEDLING2 is required for expression of KANADI2 and REVOLUTA  
653 homologues in the maize shoot apex. *genesis* **44**: 372–382.
- 654 **Heyser, W., Heyser, R., Eschrich, W., and Fritz, E.** (1977). The influence of externally  
655 supplied sucrose on phloem transport in the maize leaf strip. *Planta* **137**: 145–151.



- 656 **Jackson, D.** (1992). *In situ* hybridization in plants. In Molecular Plant Pathology. A  
657 practical approach, S.J. Gurr, M.J. McPherson, and D.J. Bowles, eds (Oxford  
658 University Press: Oxford), pp. 163–174.
- 659 **Jiao, Y. et al.** (2017). Improved maize reference genome with single-molecule  
660 technologies. *Nature* **546**: 524–527.
- 661 **Juarez, M.T., Kui, J.S., Thomas, J., Heller, B.A., and Timmermans, M.C.P.** (2004a).  
662 microRNA-mediated repression of rolled leaf1 specifies maize leaf polarity.  
663 *Nature* **428**: 84–88.
- 664 **Juarez, M.T., Twigg, R.W., and Timmermans, M.C.P.** (2004b). Specification of  
665 adaxial cell fate during maize leaf development. *Development* **131**: 4533.
- 666 **Kanai, R. and Edwards, G.E.** (1973). Separation of mesophyll protoplasts and bundle  
667 sheath cells from maize leaves for photosynthetic studies. *Plant Physiol.* **51**:  
668 1133–1137.
- 669 **Kim, J.Y., Symeonidi, E., Tin, P.Y., Denyer, T., Weidauer, D., Miras, M., Wudick,**  
670 **M., Lercher, M., Timmermans, M.C.P., and Frommer, W.B.** (2020). Unique  
671 properties of leaf phloem cells revealed by single cell transcriptomics. **submitted.**
- 672 **Kumar, S., Stecher, G., and Tamura, K.** (2016). MEGA7: Molecular Evolutionary  
673 Genetics Analysis version 7.0 for bigger datasets. *Mol. Biol. Evol.* **33**: 1870–  
674 1874.
- 675 **Langdale, J.A., Lane, B., Freeling, M., and Nelson, T.** (1989). Cell lineage analysis of  
676 maize bundle sheath and mesophyll cells. *Dev. Biol.* **133**: 128–139.
- 677 **Langdale, J.A., Rothermel, B.A., and Nelson, T.** (1988a). Cellular pattern of  
678 photosynthetic gene expression in developing maize leaves. *Genes Dev.* **2**: 106–  
679 115.
- 680 **Langdale, J.A., Zelitch, I., Miller, E., and Nelson, T.** (1988b). Cell position and light  
681 influence C4 versus C3 patterns of photosynthetic gene expression in maize.  
682 *EMBO J.* **7**: 3643–3651.
- 683 **Li, P. et al.** (2010). The developmental dynamics of the maize leaf transcriptome. *Nat*  
684 *Genet* **42**: 1060–7.
- 685 **Malcomber, S.T. and Kellogg, E.A.** (2004). Heterogeneous expression patterns and  
686 separate roles of the *SEPALLATA* gene *LEAFY HULL STERILE1* in grasses. *Plant*  
687 *Cell* **16**: 1692.
- 688 **Martin, A. et al.** (2006). Two cytosolic glutamine synthetase isoforms of maize are  
689 specifically involved in the control of grain production. *Plant Cell* **18**: 3252–3274.



- 690 **Mascher, M. et al.** (2017). A chromosome conformation capture ordered sequence of the  
691 barley genome. *Nature* **544**: 427–433.
- 692 **McInnes, L., Healy, J., and Melville, J.** (2018). UMAP: uniform manifold  
693 approximation and projection for dimension reduction. arXiv eprint  
694 arXiv:1802.03426.
- 695 **Ortiz-Ramírez, C., Arevalo, E.D., Xu, X., Jackson, D.P., and Birnbaum, K.D.** (2018).  
696 An efficient cell sorting protocol for maize protoplasts. *Curr. Protoc. Plant Biol.*  
697 **3**: e20072–e20072.
- 698 **Riesmeier, J.W., Hirner, B., and Frommer, W.B.** (1993). Potato sucrose transporter  
699 expression in minor veins indicates a role in phloem loading. *Plant Cell* **5**: 1591–  
700 1598.
- 701 **Riesmeier, J.W., Willmitzer, L., and Frommer, W.B.** (1994). Evidence for an essential  
702 role of the sucrose transporter in phloem loading and assimilate partitioning.  
703 *EMBO J.* **13**: 1–7.
- 704 **Sedelnikova, O.V., Hughes, T.E., and Langdale, J.A.** (2018). Understanding the  
705 genetic basis of C4 Kranz anatomy with a view to engineering C3 crops. *Annu.*  
706 *Rev. Genet.* **52**: 249–270.
- 707 **Slewinski, T.L., Meeley, R., and Braun, D.M.** (2009). Sucrose transporter1 functions in  
708 phloem loading in maize leaves. *J. Exp. Bot.* **60**: 881–892.
- 709 **Smedley, D., Haider, S., Ballester, B., Holland, R., London, D., Thorisson, G., and**  
710 **Kasprzyk, A.** (2009). BioMart – biological queries made easy. *BMC Genomics*  
711 **10**: 22.
- 712 **Stahl, Y. and Simon, R.** (2010). mRNA detection by whole mount *in situ* hybridization  
713 (WISH) or sectioned tissue *in situ* hybridization (SISH) in Arabidopsis. *Methods*  
714 *Mol. Biol. Clifton NJ* **655**: 239–251.
- 715 **Tausta, S.L., Li, P., Si, Y., Gandotra, N., Liu, P., Sun, Q., Brutnell, T.P., and Nelson,**  
716 **T.** (2014). Developmental dynamics of Kranz cell transcriptional specificity in  
717 maize leaf reveals early onset of C4-related processes. *J. Exp. Bot.* **65**: 3543–  
718 3555.
- 719 **Trifinopoulos, J., Nguyen, L.-T., von Haeseler, A., and Minh, B.Q.** (2016). W-IQ-  
720 TREE: a fast online phylogenetic tool for maximum likelihood analysis. *Nucleic*  
721 *Acids Res.* **44**: W232–W235.
- 722 **Walley, J.W., Sartor, R.C., Shen, Z., Schmitz, R.J., Wu, K.J., Urich, M.A., Nery,**  
723 **J.R., Smith, L.G., Schnable, J.C., Ecker, J.R., and Briggs, S.P.** (2016).  
724 Integration of omic networks in a developmental atlas of maize. *Science* **353**:  
725 814–818.

726 **Williams, M.L., Farrar, J.F., and Pollock, C.J.** (1989). Cell specialization within the  
727 parenchymatous bundle sheath of barley. *Plant Cell Environ.* **12**: 909–918.

728 **Wu, Y., Lee, S.-K., Yoo, Y., Wei, J., Kwon, S.-Y., Lee, S.-W., Jeon, J.-S., and An, G.**  
729 (2018). Rice Transcription Factor OsDOF11 Modulates Sugar Transport by  
730 Promoting Expression of Sucrose Transporter and SWEET Genes. *Mol. Plant* **11**:  
731 833–845.

732

733 **ACKNOWLEDGMENTS**

734 We would like to thank Reinout Laureyns (VIB-UGhent) for advice regarding in situ  
735 hybridization, Kajetan Linkert (HHU) regarding GUS histochemistry, Max Blank and  
736 Tatjana Buchmann (WF lab) for cDNA library preparation, and Thomas Kleist (HHU) for  
737 advice on phylogenetic analyses. This research was supported by Deutsche  
738 Forschungsgemeinschaft (DFG, German Research Foundation) under Germany's  
739 Excellence Strategy – EXC-2048/1 – project ID 390686111 and SFB 1208 – Project-ID  
740 267205415, as well as the Alexander von Humboldt Professorship to WBF.

741

742 **AUTHOR CONTRIBUTIONS**

743 Conceptualization, M.B., J.K., W.B.F.; Methodology, M.B., C.P.S.K, T.H., T.L.;  
744 Investigation, M.B, N.Z, T.L, C.P.S.K.; Resources, K.K, W.B.F.; Writing, M.B., W.B.F.;  
745 Supervision, J.K., W.B.F.

746

747 **DECLARATION OF INTERESTS**

748 The authors do not declare any competing interests.

749 **MAIN FIGURES**

750 Table 1. Genes of interest differentially expressed between clusters adBS and abBS

751 Figure 1. Mesophyll and bundle sheath clusters show canonical expression of C4 photosynthesis  
752 genes

753 Figure 2. Abaxial BS cluster is enriched for genes encoding transport proteins

754 Figure 3. Arabidopsis homologs of maize <sup>ab</sup>BS-specific genes are expressed in Arabidopsis phloem  
755 parenchyma

756 Figure 4. SWEET13a protein is localized to abaxial BSC of rank-2 veins

757 Figure 5. Abaxial BS transcripts are co-regulated during the sink-source transition

758 Figure 6. Phloem loading occurs via the abBS in maize

759

760 **SUPPLEMENTARY DATA**

761 Supplementary. Fig. 1. qRT-PCR of putative BSC and vascular-expressed genes as an indication  
762 of protoplast cell type diversity prior to sequencing

763 Supplementary. Fig. 2. Expression patterns of canonical C4 photosynthesis-related genes in single  
764 cell sequencing dataset

765 Supplementary. Fig. 3. UMAP plots of glutamine synthetase, transport-related proteins, and  
766 transcription factors in bundle sheath cells

767 Supplementary. Fig. 4. Neighbor joining tree of family of UmamiT amino acid transporters in  
768 Arabidopsis, maize, and barley veins

769 Supplementary. Fig. 5. SWEET and SUT mRNA localization and SWEET13a protein localization  
770 in rank-2 intermediate and major

771 Supplementary. Fig. 6. Probe design for in situ hybridization and pSWEET13a:SWEET13a:GUS  
772 construct schematic

773 Supplementary. Fig. 7. Correlation of mRNA counts between protoplasted cells and whole leaf

774

775 Supplementary. Table 1. Marker genes for all clusters

776 Supplementary. Table 2. mRNA enrichment of C4 photosynthesis-related genes in MS and BS  
777 clusters

778 Supplementary. Table 3. GO term analysis for MS clusters

779 Supplementary. Table 4. Genes used in this study

780 Supplementary. Table 5. Primers

781 Supplementary. Table 6. Protoplast enriched, depleted mRNAs

782 Supplementary. Text 1. A subset of mesophyll cells appears to be specialized in iron metabolism

**Table 1.**

| <sup>ab</sup> BS cluster | logFC | FDR     | description                                                |
|--------------------------|-------|---------|------------------------------------------------------------|
| Zm00001d023677           | 4.990 | 2.3E-08 | <b>SWEET13a</b>                                            |
| Zm00001d041067           | 3.959 | 3.2E-08 | <b>SWEET13c</b>                                            |
| Zm00001d016625           | 3.675 | 3.3E-07 | Os02g0519800 protein                                       |
| Zm00001d023673           | 2.156 | 2.2E-06 | <b>SWEET13b</b>                                            |
| Zm00001d035717           | 2.140 | 3.3E-07 | <b>UmamiT21a</b>                                           |
| Zm00001d033551           | 1.412 | 3.3E-07 | Phosphoglycerate mutase-like family protein                |
| Zm00001d033980           | 1.252 | 4.5E-03 | <i>Ustilago maydis</i> induced12                           |
| Zm00001d019062           | 1.180 | 2.9E-04 | <b>Membrane H<sup>+</sup>ATPase3</b>                       |
| Zm00001d035243           | 1.123 | 1.4E-03 | <b>AAP45</b>                                               |
| Zm00001d038753           | 1.114 | 7.7E-05 | Ubiquitin domain-containing protein                        |
| Zm00001d017966           | 1.098 | 5.0E-04 | Dihydropyrimidine dehydrogenase (NADP(+)) chloroplastic    |
| Zm00001d012231           | 1.055 | 9.2E-04 | <b>AAP56</b>                                               |
| Zm00001d018867           | 0.992 | 1.1E-05 | Syntaxin 132                                               |
| Zm00001d000299           | 0.920 | 1.1E-05 | Endosomal targeting BRO1-like domain-containing protein    |
| Zm00001d002489           | 0.809 | 4.5E-03 | PLATZ transcription factor family protein                  |
| Zm00001d035651           | 0.806 | 5.0E-04 | DNA binding with one finger3                               |
| Zm00001d027268           | 0.753 | 6.5E-04 | <b>STP3 (sugar transport protein 3)</b>                    |
| Zm00001d005344           | 0.737 | 1.4E-03 | Histidine-containing phosphotransfer protein 2             |
| Zm00001d013296           | 0.737 | 4.5E-03 | ATP sulfurylase 1                                          |
| Zm00001d030103           | 0.735 | 8.1E-03 | Probable xyloglucan endotransglucosylase/hydrolase protein |
| Zm00001d052038           | 0.723 | 3.8E-03 | Putative HLH DNA-binding domain superfamily protein        |
| Zm00001d012559           | 0.692 | 2.1E-03 | Stomatal closure-related actin-binding protein 1           |
| Zm00001d015025           | 0.684 | 4.5E-03 | AMP binding protein                                        |
| Zm00001d038768           | 0.636 | 5.0E-03 | Reticulon-like protein B4                                  |
| Zm00001d044768           | 0.633 | 3.8E-03 | <b>Protein NRT1/ PTR FAMILY 5.8</b>                        |
| Zm00001d033981           | 0.633 | 4.8E-03 | ATP sulfurylase 1                                          |
| Zm00001d015618           | 0.619 | 8.1E-03 | Probable cinnamyl alcohol dehydrogenase                    |
| Zm00001d041710           | 0.597 | 5.0E-03 | Glutathione synthetase chloroplastic                       |
| Zm00001d036401           | 0.596 | 5.0E-03 | Endoplasmic homolog                                        |
| Zm00001d018758           | 0.584 | 8.1E-03 | Succinate dehydrogenase1                                   |
| Zm00001d019670           | 0.578 | 8.5E-03 | Kinesin-like protein KIN-4A                                |
| Zm00001d022042           | 0.574 | 9.4E-04 | Eukaryotic translation initiation factor 5A                |
| Zm00001d049597           | 0.567 | 4.9E-03 | External alternative NAD(P)H-ubiquinone oxidoreductase B4  |
| Zm00001d016662           | 0.536 | 3.8E-03 |                                                            |
| Zm00001d018178           | 0.535 | 4.7E-03 | bZIP4 (ABSCISIC ACID-INSENSITIVE 5-like protein 5)         |
| Zm00001d032249           | 0.532 | 2.1E-03 | KANADI 1                                                   |
| Zm00001d002625           | 0.531 | 3.4E-03 | Probable methyltransferase PMT15                           |
| Zm00001d021773           | 0.517 | 9.9E-03 |                                                            |
| Zm00001d039270           | 0.512 | 3.5E-03 | Glutaredoxin family protein                                |

**Table 1.**

Genes of interest differentially expressed between clusters <sup>ab</sup>BS and <sup>ad</sup>BS. 9 out of 39 genes specific to the <sup>ab</sup>BS cluster are specific to transmembrane transport (bold). Criteria for inclusion were average log fold change > 0.5 for all cells in subcluster and FDR-adjusted p-value < .01. The <sup>ab</sup>BSC specificity was validated for three genes, *SWEET13a*, *b* and *c*. Whether genes with lower FDR-adjusted p-values also show high specificity will require experimental validation.

**Figure 1.**

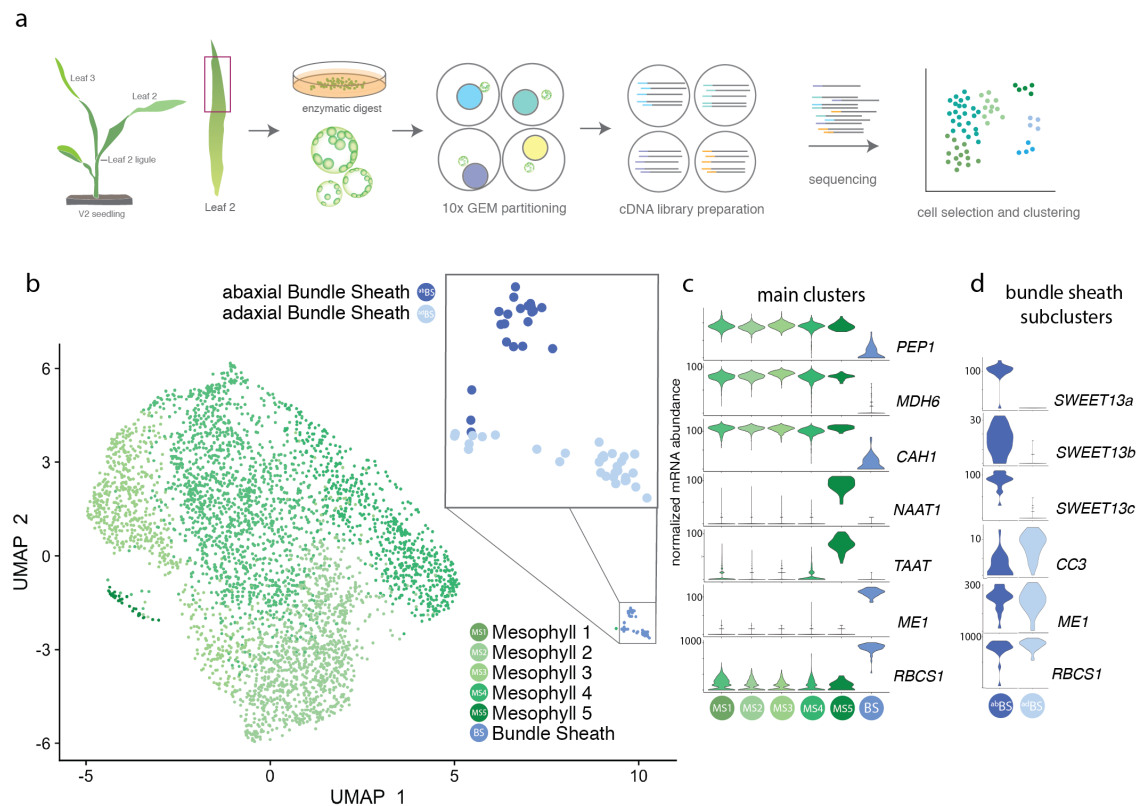

**Figure 1. Mesophyll and bundle sheath clusters show canonical expression of C4 photosynthesis genes**

**a.** Illustration of protoplasting, 10x Chromium Gel Bead-in-Emulsion (GEM) partitioning and cDNA synthesis, RNA sequencing, and data analysis. **b.** UMAP plot showing 2D representation of cell relationships in multidimensional space; bundle sheath cells separate into 2 subclusters at higher resolution (inset). The “upper” and “lower” cluster were later determined to correspond to abaxial and adaxial BSC (Fig. 2), and are therefore named <sup>ab</sup>BS and <sup>ad</sup>BS. **c.** Violin plots showing distribution of normalized mRNA counts of marker genes for cells in each cluster. Genes were canonical C4 markers (*PEP1*, *MDH6*, *CA*, *ME1*, *RBCS1*) or genes that identify unique clusters (*NAAT1*, *TAAT*). **d.** Violin plots showing normalized mRNA levels of genes differentially expressed between <sup>ab</sup>BS and <sup>ad</sup>BS subclusters (*SWEET13a*, *b*, and *c*, *CC3*) and of example genes highly expressed in both clusters (*ME1*, *RBCS1*). Gene IDs are provided in Supplementary Table 4.

**Figure 2.**

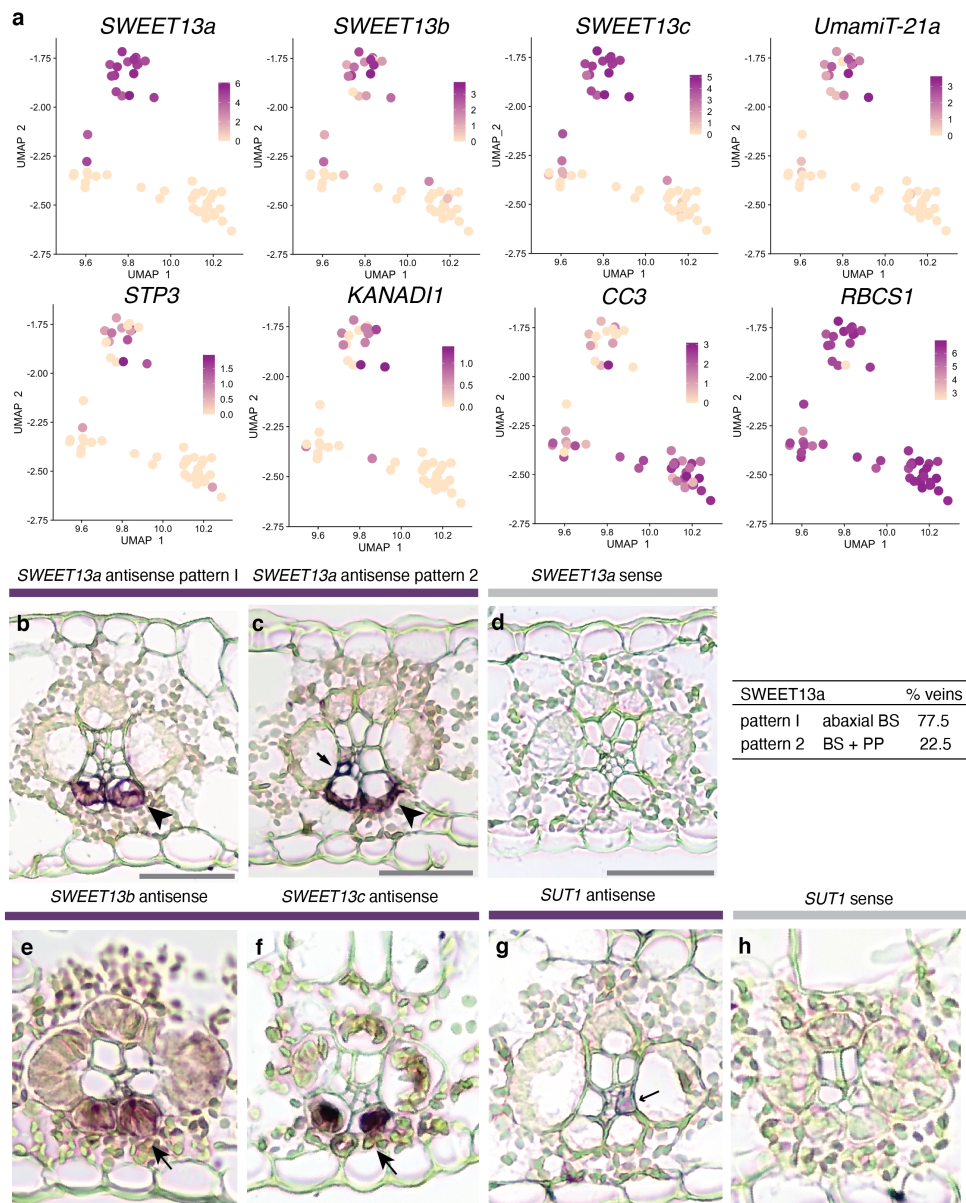

**Figure 2. Abaxial BS cluster is enriched for genes encoding transport proteins**

**a.** Feature plots show normalized levels of mRNAs for genes differentially expressed between the two clusters of bundle sheath cells plotted in UMAP space. **b - f.** *In situ* hybridization of *SWEET13a*, *SWEET13b*, and *SWEET13c*. Rank-2 intermediate veins from sections hybridized with antisense probes for *SWEET13a*, *SWEET13b*, and *SWEET13c* showed mRNA localization of three *SWEET13* genes was largely limited to abaxial bundle sheath cells. **b - c.** *SWEET13a* mRNA localization was predominantly in <sup>ab</sup>BS cells in the majority of veins (77.5%) and to PP in a subset of veins (22.5%) (n = 824). **d.** No staining was visible after hybridization with *SWEET13a* sense probe. **e - f.** *SWEET13b* and *SWEET13c* probes showed signal predominantly in <sup>ab</sup>BS cells. **g.** *SUT1* mRNA is localized to a vascular cell which is likely a companion cell in rank-2 intermediate veins (arrow). **h.** No staining visible after hybridization with *SUT1* sense probe. See Supplementary Figure 5 for intermediate rank-1 and major veins. All error bars are 100µm.



**Figure 3.**

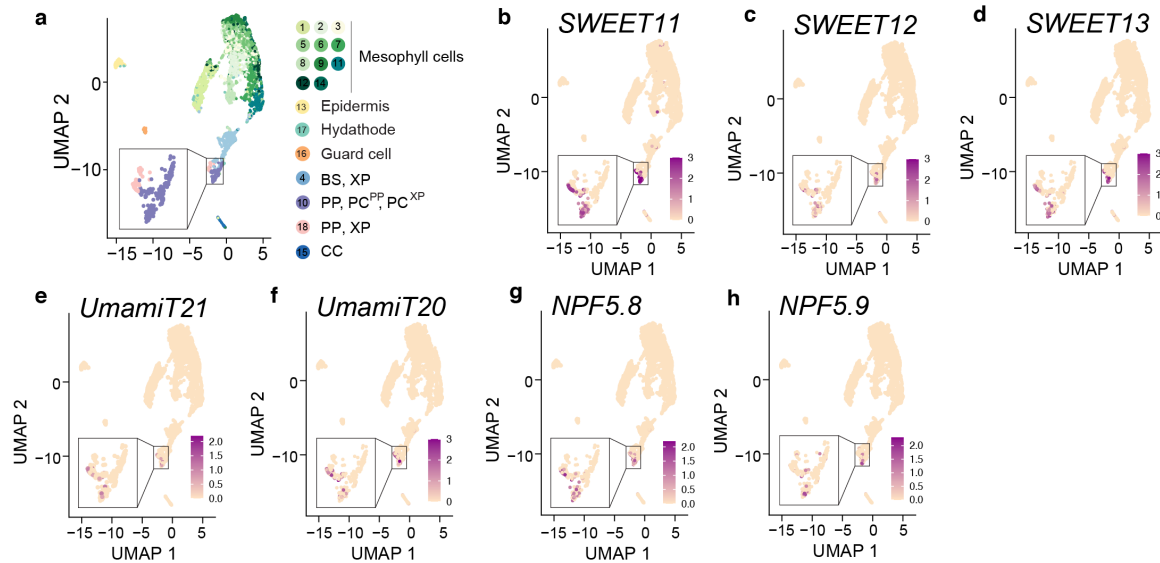

**Figure 3. Arabidopsis homologs of maize <sup>ab</sup>BS-specific genes are expressed in Arabidopsis phloem parenchyma**

Maize transporters showing <sup>ab</sup>BS mRNA enrichment are homologous to many Arabidopsis transporters with Arabidopsis phloem parenchyma mRNA enrichment. **a.** UMAP plot showing 2D representation of cell relationships in multidimensional space for single-cell sequencing of Arabidopsis leaf. Clusters are indicated by colors to the right of the UMAP plot. Feature plots show normalized levels of mRNA transcripts for Arabidopsis transport proteins homologous to <sup>ab</sup>BS transport proteins. **b-d.** *AtSWEET11* (AT3G48740), *12* (AT5G23660), and *13* (AT5G50800) are orthologs to *ZmSWEET13a*, *b*, and *c*. **e.** *AtUmamiT21* (AT5G64700) is homologous to *ZmUmamiT21a*. **f.** *AtUmamiT20* (AT4G08290) is homologous to *ZmUmamiT21a* (Supplementary Fig. 4). **g-h.** *AtNPF5.8* (AT5G14940) and *AtNPF5.9* (AT3G01350) are homologous to *ZmNRT1*.



**Figure 4.**

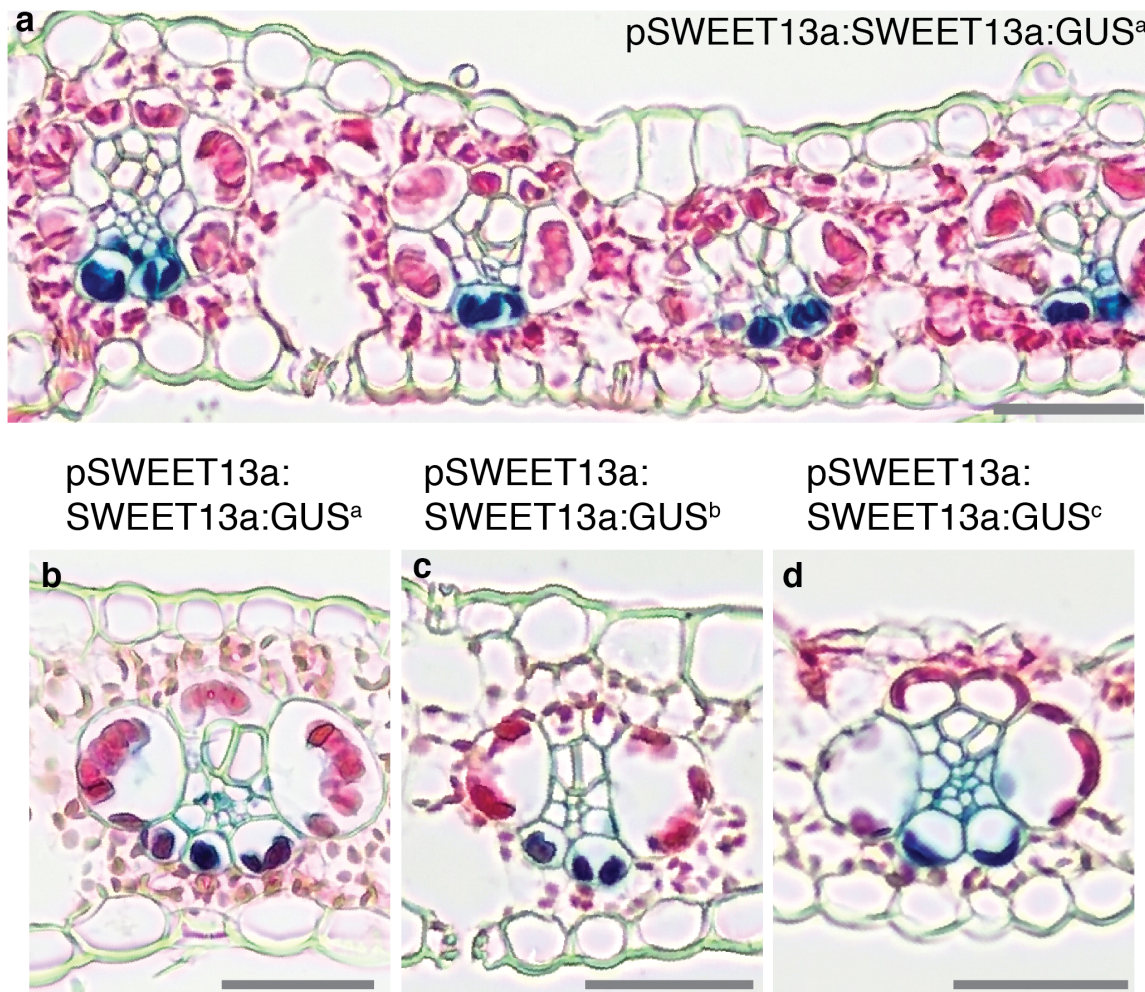

**Figure 4. SWEET13a protein is localized to abaxial BSC of rank-2 veins**

GUS histochemistry in leaves of maize lines transformed with the translational fusion construct pSWEET13a:SWEET13a-GUS. **a.** Chloro-bromoindigo precipitate (blue) is detected specifically in abaxial bundle sheath cells of maize plants transformed with pSWEET13a:SWEET13a:GUS plus. **b - d.** Three independent transformation events (a, b, and c: pSWEET13a:SWEET13a:GUS<sup>a, b, and c</sup>) showed similar expression patterns in rank-2 intermediate veins, rank-1 intermediate veins, and major veins (for rank-1 and major veins see Supplementary Fig. 5). **b.** Line “a,” **c.** Line “b,” **d.** Line “c.” Sections are counterstained with Eosin-Y; scale bars are 100 μm.

**Figure 5.**

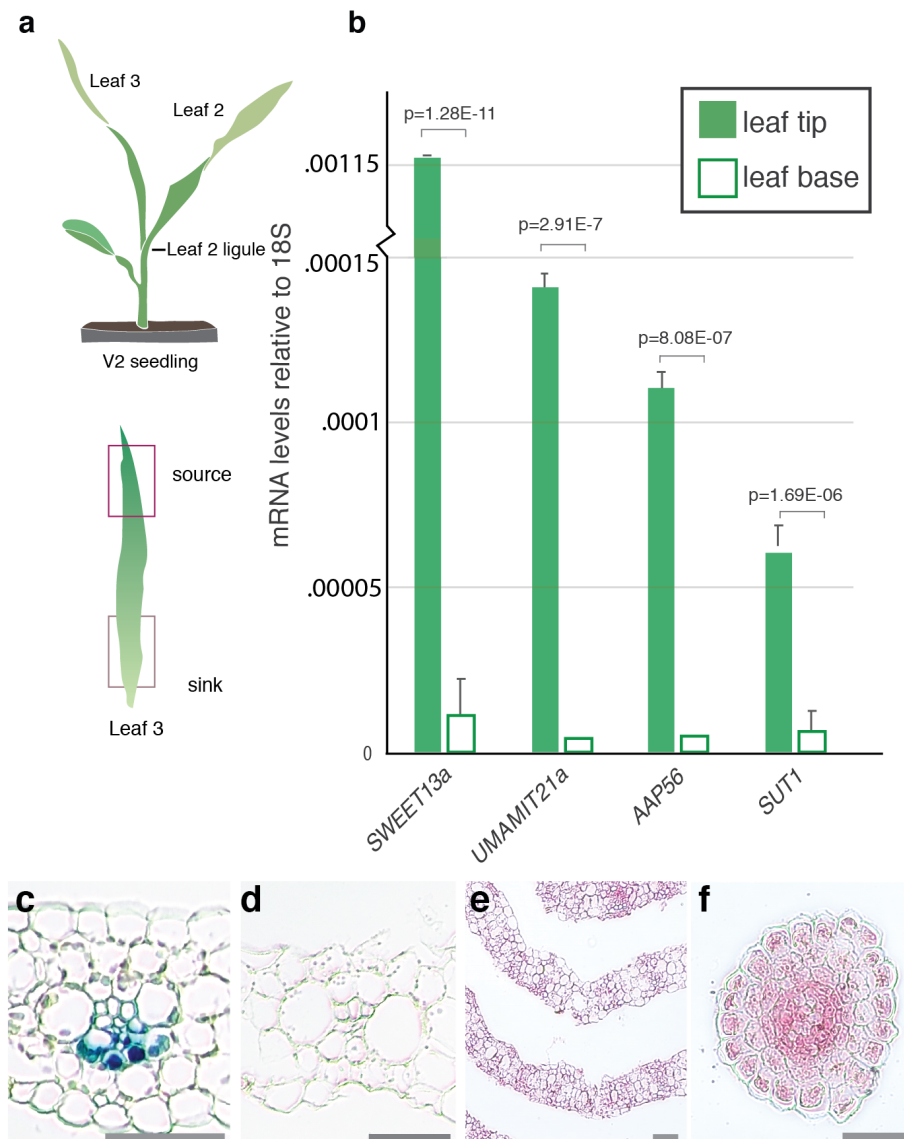

**Figure 5. Abaxial BS transcripts are co-regulated during the sink-source transition**

**a.** Tissue selected for qRT-PCR: V2-stage seedling with source and sink tissue highlighted; base of leaf 3 is still in the whorl and is net-sink tissue (Li et al., 2010). **b.** 18S-normalized mRNA levels of <sup>ab</sup>BS-specific transport proteins (*SWEET13a*, *UmamiT21a*, *AAP45*) and *SUT1* in source (tip) and sink (base) tissue. Values are average of three technical (qRT-PCR) replicates of three pools of two plants; error bars represent SEM. \*Students two-tailed paired t-test values shown. Independent repeats confirmed the data.

**c.** p*SWEET13a*:*SWEET13a*:GUSplus transformed B73 seedling segments after 12-48 h incubation in GUS staining solution. V2 leaf 3 tip (12 h), **d.** leaf 3 sheath (48 h), **e.** stem cross section 1 cm above soil (48 h), **f.** cross section across root tip (48 h). Of these, only the tip of leaf 3 (source) showed chloro-bromindigo precipitate indicative of *SWEET13a* expression. Scale bars: 100  $\mu$ m.

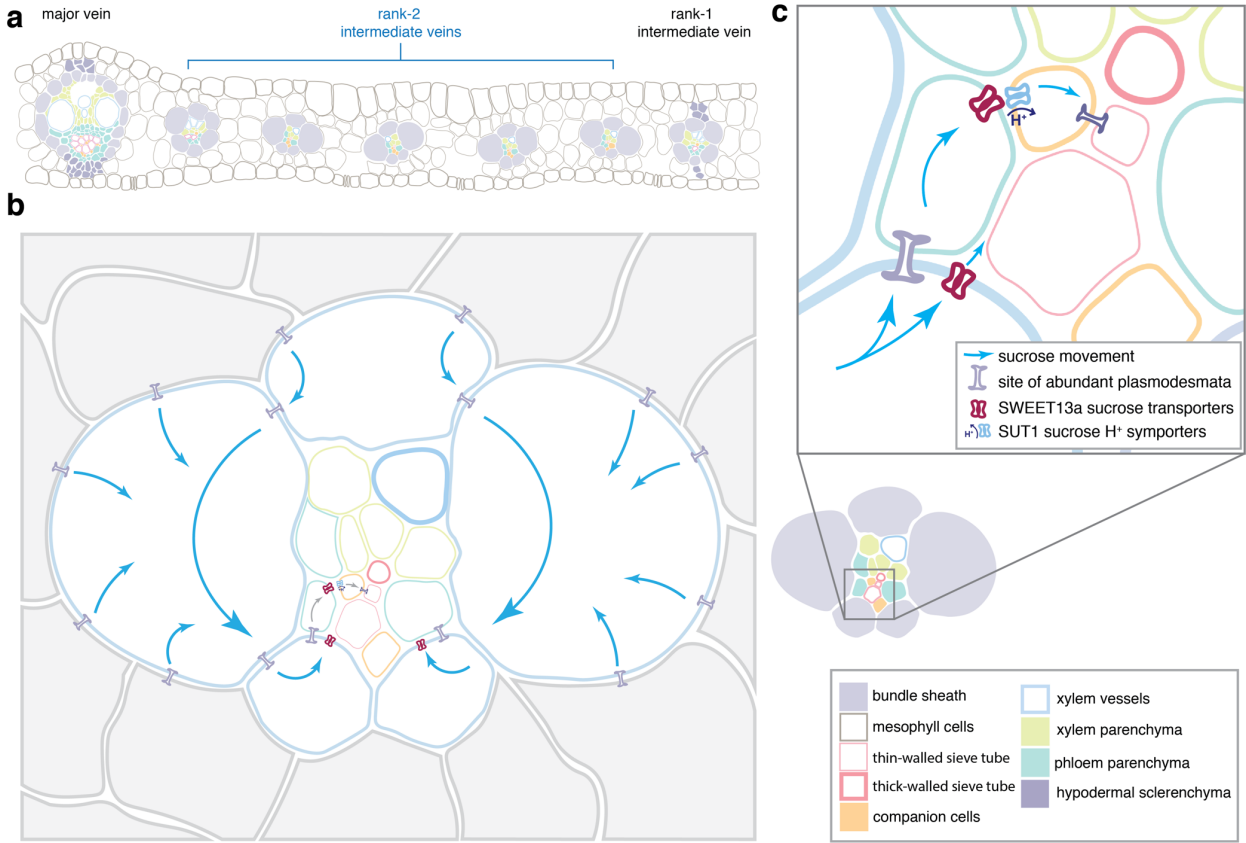

**Figure 6. Phloem loading occurs via the <sup>ab</sup>BS in maize**

**a.** Example of arrangement and relative numbers of major veins, rank-1 intermediate veins, and rank-2 intermediate veins in a mature maize leaf. Note that rank-1 intermediate veins are distinguished from rank-2 by the presence of hypodermal sclerenchyma. **b.** A rank-2 intermediate vein surrounded by bundle sheath (blue outline) and mesophyll (grey) cells. Sucrose movement down its concentration gradient is indicated by blue arrows. **b. Inset panel** shows detail of sucrose movement from bundle sheath cells into apoplasm via SWEET13 transporters, or to phloem parenchyma (teal) via plasmodesmata, where it is then effluxed to the apoplasmic space by SWEETs. Sucrose in the apoplasm is taken up by SUT1 into the companion cells-sieve element (orange, pink) complex for long distance transport.

## SUPPLEMENTARY DATA

### Supplementary text

#### **A subset of mesophyll cells appears to be specialized in iron metabolism**

Subcluster MS5 (visible in the lower left corner of Figure 1b) shared mesophyll identity but appeared to be specialized in metal accumulation and transport, as indicated by high and specific expression of four nicotianamine synthase genes, *NASI*, *2*, *9*, and *10*, which are involved in iron chelation; one iron phytosiderophore transporter, *YSI* (*yellow stripe 1*); and various additional genes involved in metal transport and metabolism (Supplementary Table 1). M5 cells could either represent a cell type with a specific localization in the leaf or correspond to cells that contain different levels of iron.

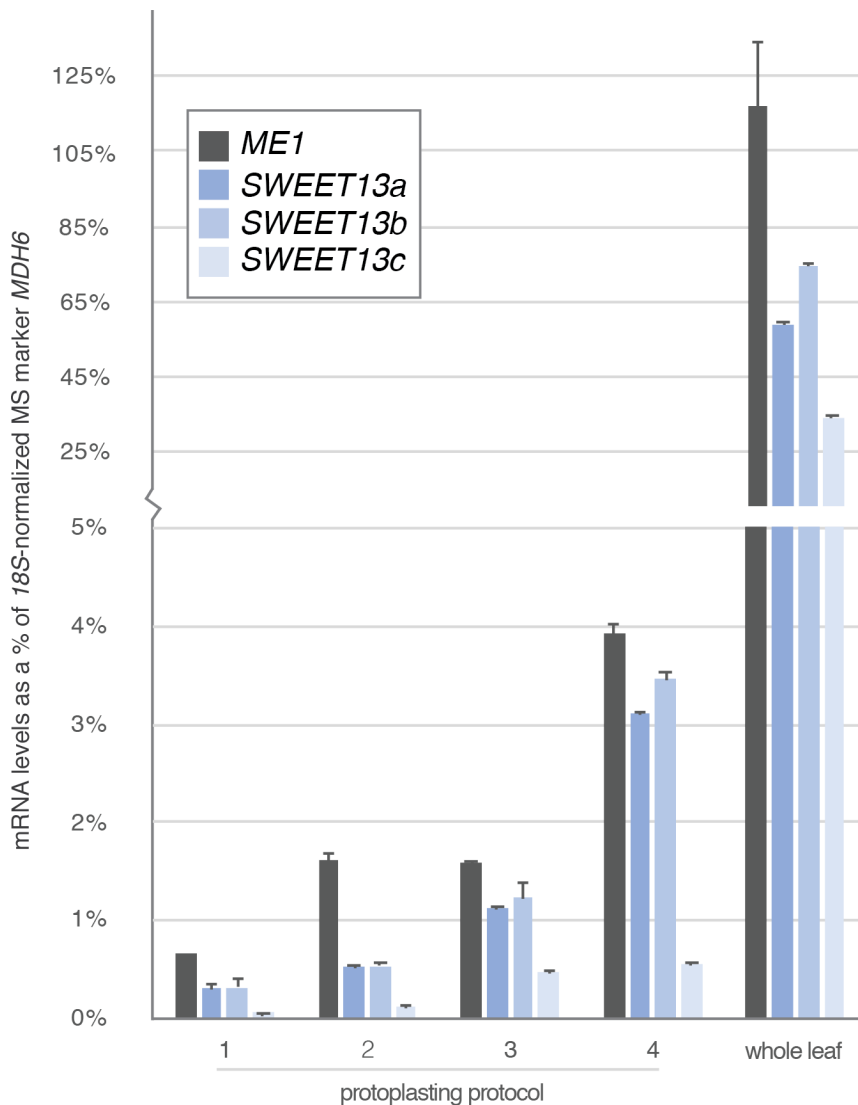

### Supplementary Figure 1. qRT-PCR of putative BSC and vascular-expressed genes as an indication of protoplast cell type diversity prior to sequencing

Normalized mRNA levels of *ME1*, *SWEET13a*, *SWEET13b*, and *SWEET13c* shown as a percentage of 18S-normalized expression of a mesophyll marker gene, *NADP-malate dehydrogenase6 (MDH6)*, after different protoplasting treatments. Error bars represent SEM of technical duplicates.

Protocol 1, standard enzyme cocktail (see Materials and Methods) with 3.5 h incubation. Protocol 2, doubled enzyme concentration. Protocol 3, isolated BS strands released after 2 h and continued protoplasting of filtered BS strands in fresh enzyme solution to deplete mesophyll cells. Protocol 4, incubated leaf tissue in pretreatment solution (2 mM L-cysteine and 164 mM sorbitol), which yielded the highest ratio of BS:MS marker genes.



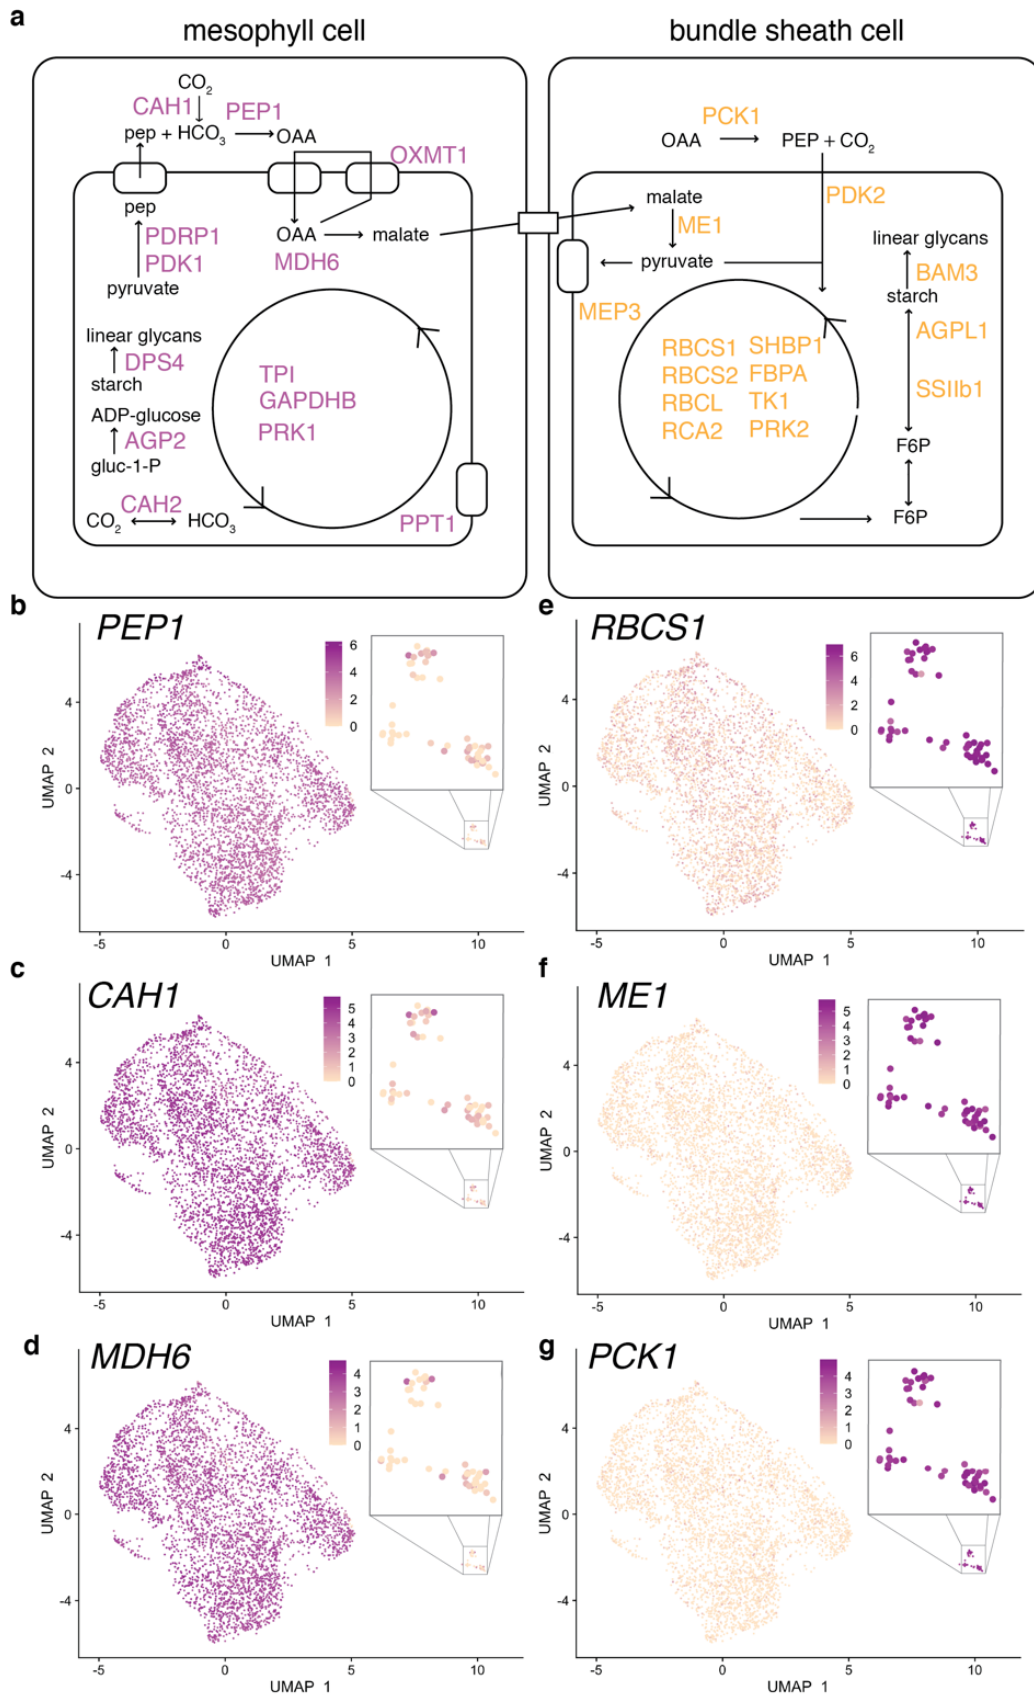

## Supplementary Figure 2. Schematic of C4 photosynthesis related genes and relative expression in BS and MS clusters.

**a.** Partitioning of proteins involved in C4 photosynthesis between mesophyll and bundle sheath cells in maize (Friso et al., 2010). For all proteins displayed, mRNA expression in this scRNA-seq dataset was specific to either mesophyll or bundle sheath cells ( $\log_{2}FC > 1.0$ ; FDR-adjusted p-value  $< .05$ ). **b.** Gene IDs, symbols, and full names are shown along with Log FC values in Supplementary Table 2. **b-g.** Feature plots show normalized levels of mRNAs for canonical C4 photosynthesis genes expressed differentially in mesophyll and bundle sheath. **b.** *PEP1* (Phosphoenolpyruvate carboxylase 1; Zm00001d046170) **c.** *CAH1* (Carbonic anhydrase 1; Zm00001d044099) **d.** *MDH6* (NADP-dependent malate dehydrogenase 6; Zm00001d031899) **e.** *RBCS1* (Ribulose biphosphate carboxylase small subunit 1; Zm00001d052595) **f.** *ME1* (NADP-dependent malic enzyme 1; Zm00001d000316) **g.** *PCK1* (Phosphoenolpyruvate carboxykinase 1; Zm00001d028471)

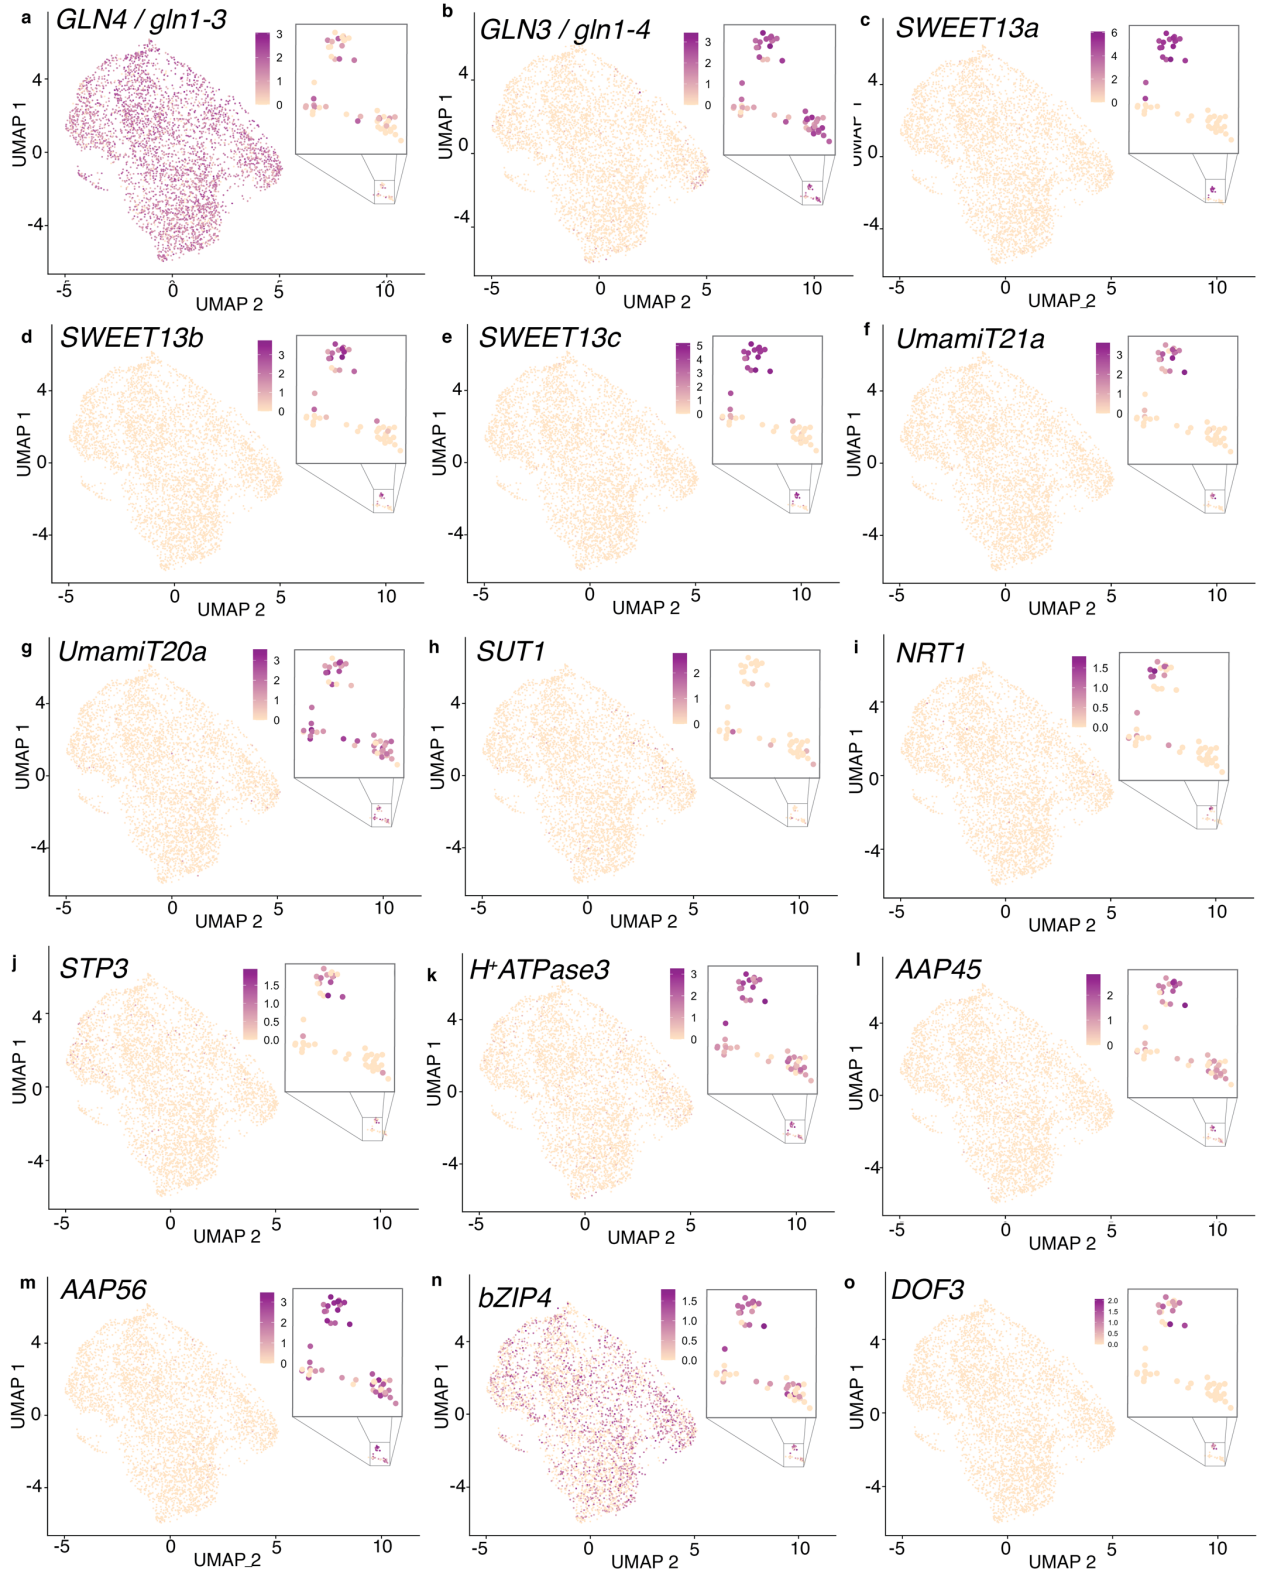



### Supplementary Figure 3. UMAP plots of glutamine synthetase, transport-related proteins, and transcription factors in bundle sheath cells

**a - b.** Feature plots show normalized levels of mRNA transcripts for glutamine synthetase genes expressed differentially in mesophyll and bundle sheath. **a.** *GLN4* (*gln1-3*, protein GS3, Zm00001d017958) is widely expressed in mesophyll cells and some bundle sheath cells. **b.** *GLN3* (*gln1-4*, protein GS4, Zm00001d028260) is expressed in bundle sheath cells.

**c - o.** Feature plots show normalized levels of mRNA transcripts for transport-related genes and transcription factors expressed in <sup>ad</sup>BS or <sup>ab</sup>BS. **c.** *SWEET13a* (Zm00001d023677), **d.** *SWEET13b* (Zm00001d023673), **e.** *SWEET13c* (Zm00001d041067), and **f.** *UmamiT21a* (Zm00001d035717) are specific to <sup>ab</sup>BS. **g.** *UmamiT20a* (Zm00001d044951) is expressed in <sup>ab</sup>BS and <sup>ad</sup>BS. **h.** *SUT1* (Zm00001d027854) is not highly expressed in any cell type in this dataset. **i.** *NRT1* (Zm00001d044768), **j.** *STP3* (Zm00001d027268), **k.** *H<sup>+</sup>ATPase3* (Zm00001d019062), **l.** *AAP45* (Zm00001d035243), **m.** *AAP56* (Zm00001d012231), **n.** *bZIP4* (Zm00001d018178) and **o.** *DOF3* (Zm00001d035651) are enriched in <sup>ab</sup>BS relative to <sup>ad</sup>BS.

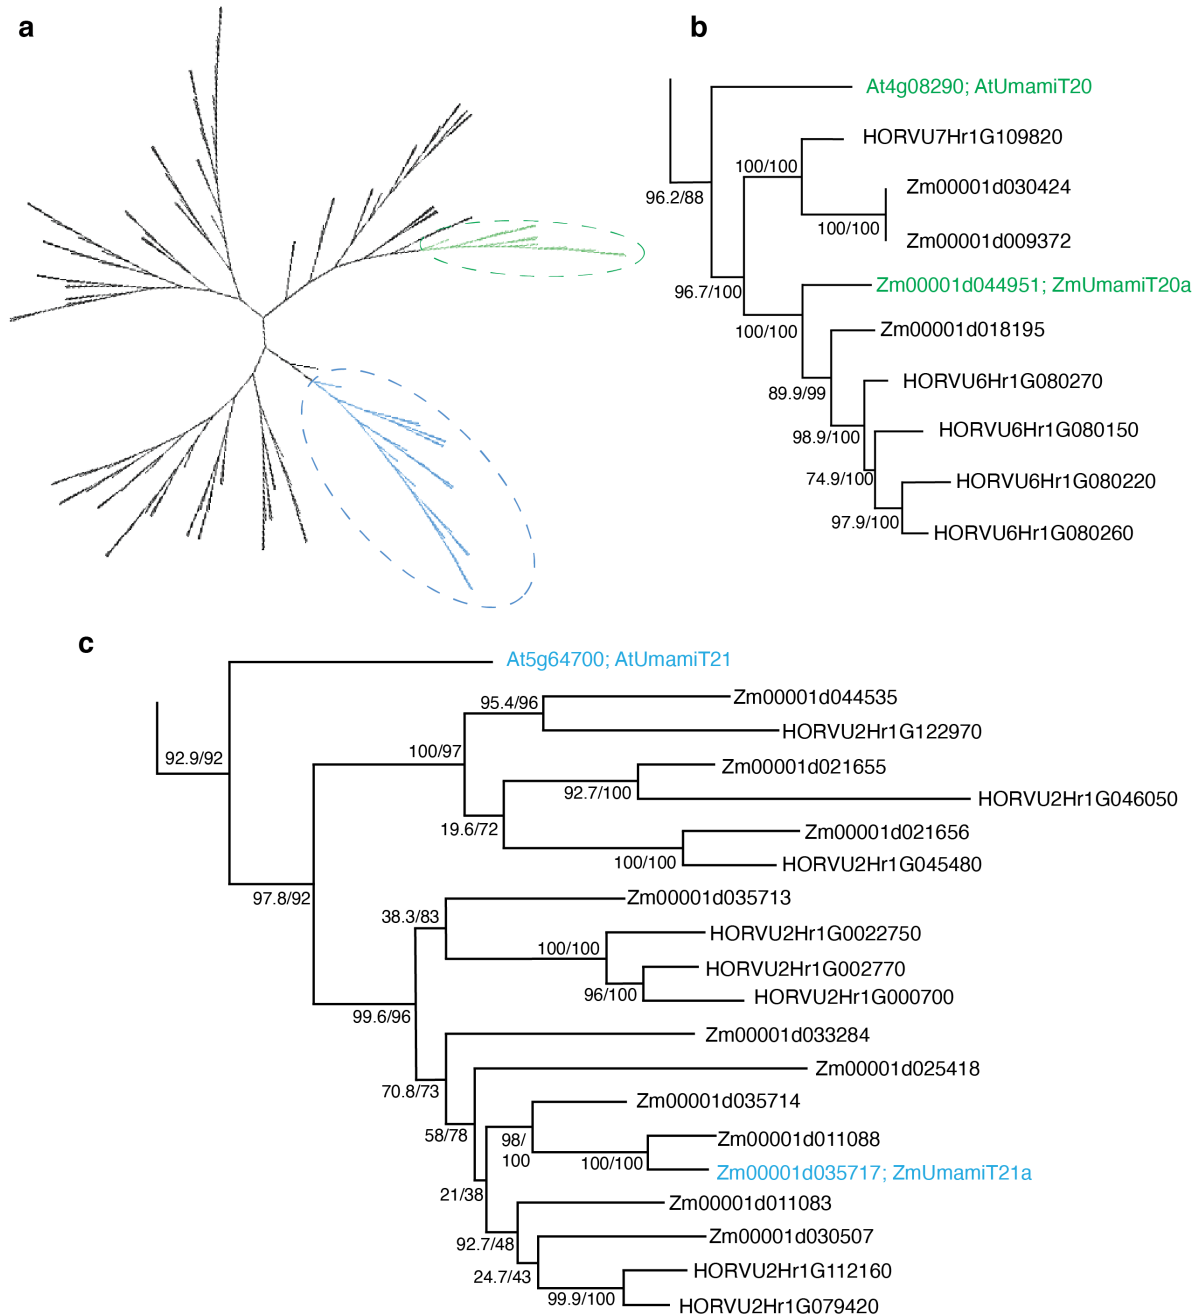

**Supplementary Figure 4. Neighbor joining tree of family of UmamiT amino acid transporters in Arabidopsis, maize, and barley**

**a.** Cladogram of all UmamiT amino acid sequences in maize, barley, and Arabidopsis **b.** Phylogram of green highlighted clade containing the ZmUmamiT expressed in all BSC types. Zm00001d44951 is most closely related to Arabidopsis UmamiT20. **c.** Phylogram of blue highlighted clade containing the ZmUmamiT expressed specifically in <sup>ab</sup>BSC. Zm00001d035717 is most closely related to Arabidopsis UmamiT21. Values at nodes are % UF-bootstraps out of 1000/% SH-aLRT.

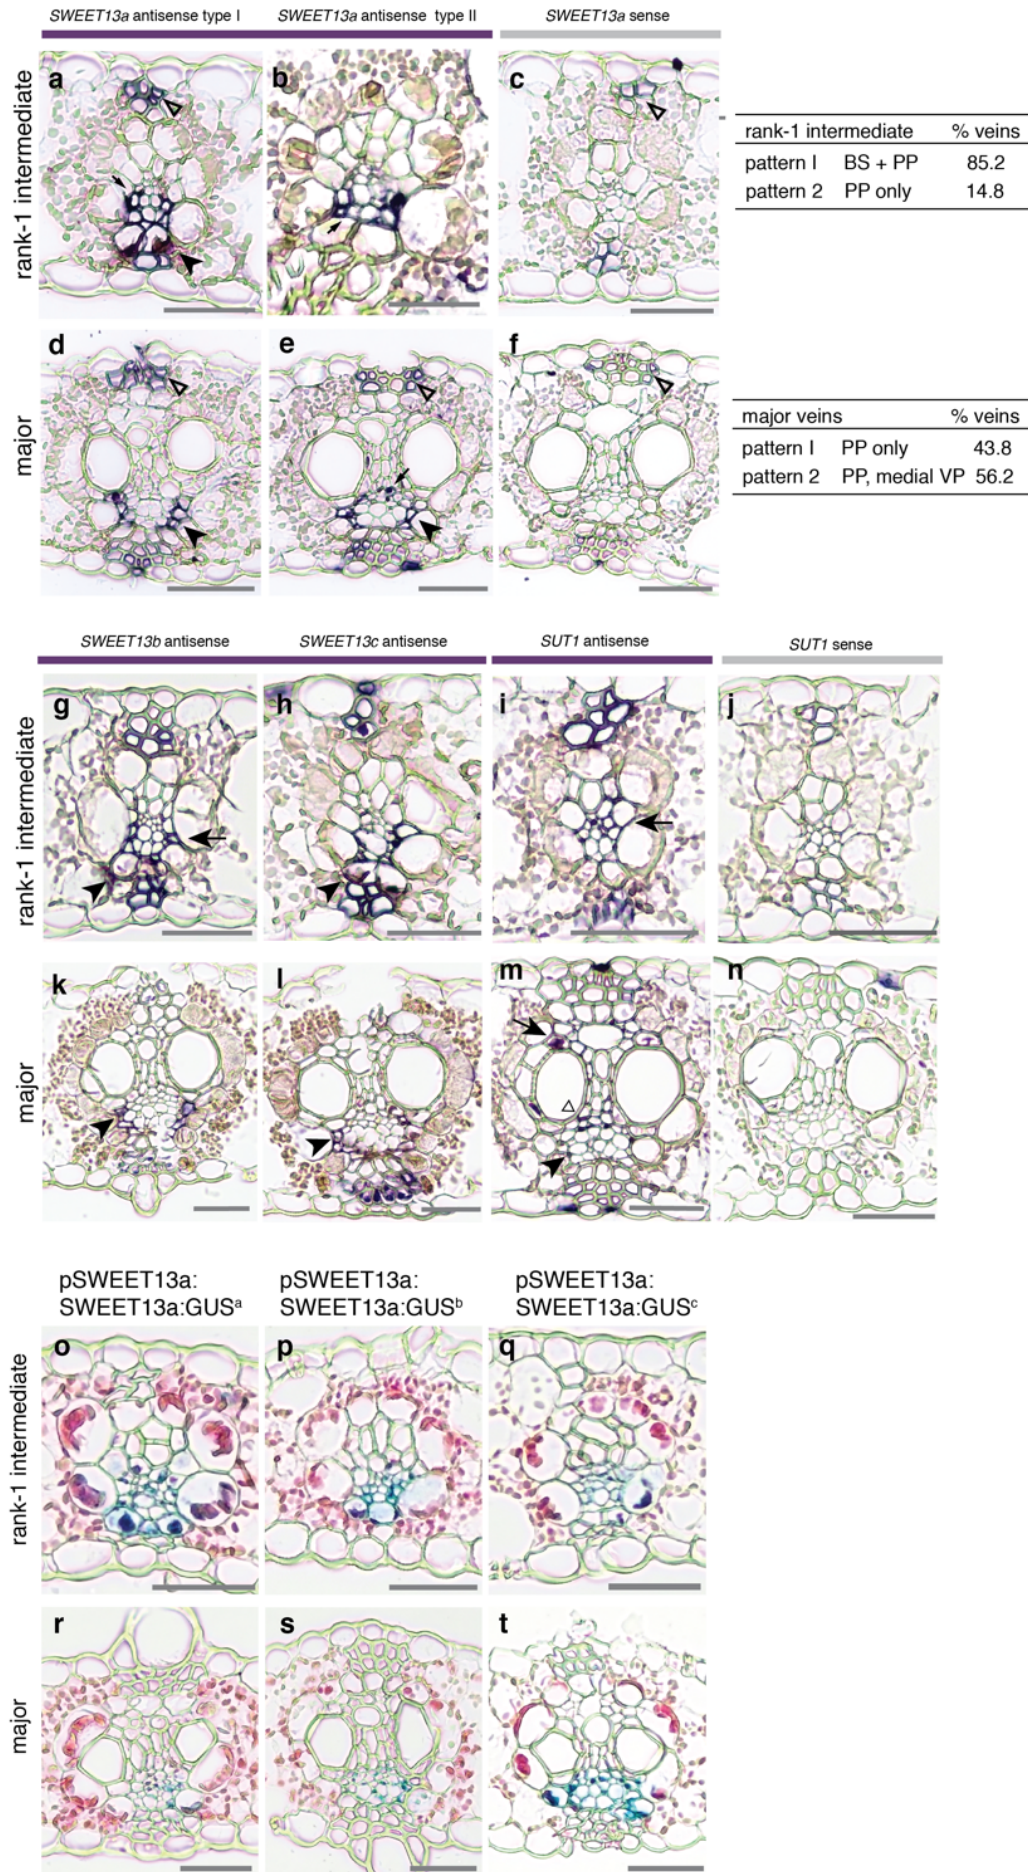

### Supplementary Figure 5. SWEET and SUT mRNA localization and SWEET13a protein localization in rank-2 intermediate and major veins

**a - c.** SWEET13a mRNA localization in rank-1 intermediate veins **a.** Pattern 1: <sup>ab</sup>BSC (arrowhead) and vascular parenchyma (VP) (arrow), and **b.** Pattern 2: mainly in VP (arrow). **c.** rank-1 vein in sense-probe-hybridized section. **d-f.** SWEET13a mRNA localization in major veins **d.** Pattern 1: in phloem parenchyma (PP) only (arrow), and **e.** Pattern 2: in PP and medial VP (parenchyma between xylem and phloem) (arrow). **f.** *SWEET13a* major vein in sense-probe -hybridized section. Hypodermal sclerenchyma is considered background (open triangles). Table indicates percentage of veins meeting the above criteria for each vein type. Rank-1 intermediate, n = 196; and major veins, n = 98; variable n-numbers are due to relative proportions of each vein type in the leaf. Scale bars are 100  $\mu$ m.

**g - j.** *SWEET13b*, *c*, and *SUT1* mRNA localization in rank-1 intermediate veins. **g.** For *SWEET13b* antisense probe-hybridized rank-1 intermediate veins, staining was in <sup>ab</sup>BS (arrowhead) and vascular parenchyma (arrow). **h.** For *SWEET13c* antisense probe-hybridized rank-1 intermediate veins, staining was in <sup>ab</sup>BS (arrowhead) and vascular parenchyma (arrow). **i.** For *SUT1* antisense probe-hybridized rank-1 intermediate veins, staining was in vasculature (arrow). **j.** *SUT1* sense probe-hybridized rank-1 intermediate vein.

**k - n.** *SWEET13b*, *c*, and *SUT1* mRNA localization in major veins. **k.** For *SWEET13b* antisense probe-hybridized major veins, staining was in phloem parenchyma (arrowhead). **l.** For *SWEET13c* antisense probe-hybridized major veins, staining was in phloem parenchyma (arrowhead). **m.** For *SUT1* antisense probe-hybridized major veins, staining was in companion cells (arrow), in vascular parenchyma between xylem and phloem (triangle), and in xylem parenchyma (arrowhead). **n.** *SUT1* sense probe-hybridized major vein. Scale bars are 100  $\mu$ m.

**o - t.** SWEET13a protein localization as visualized by GUS staining of SWEET13a:GUS-transformed B104 plants. Chloro bromoindigo precipitate is localized to abaxial portion of veins in both rank-1 intermediate (**o - q**) and major veins (**r - t**) of all three independent transformation events. Scale bars are 100  $\mu$ m; sections are counterstained with Eosin-Y.

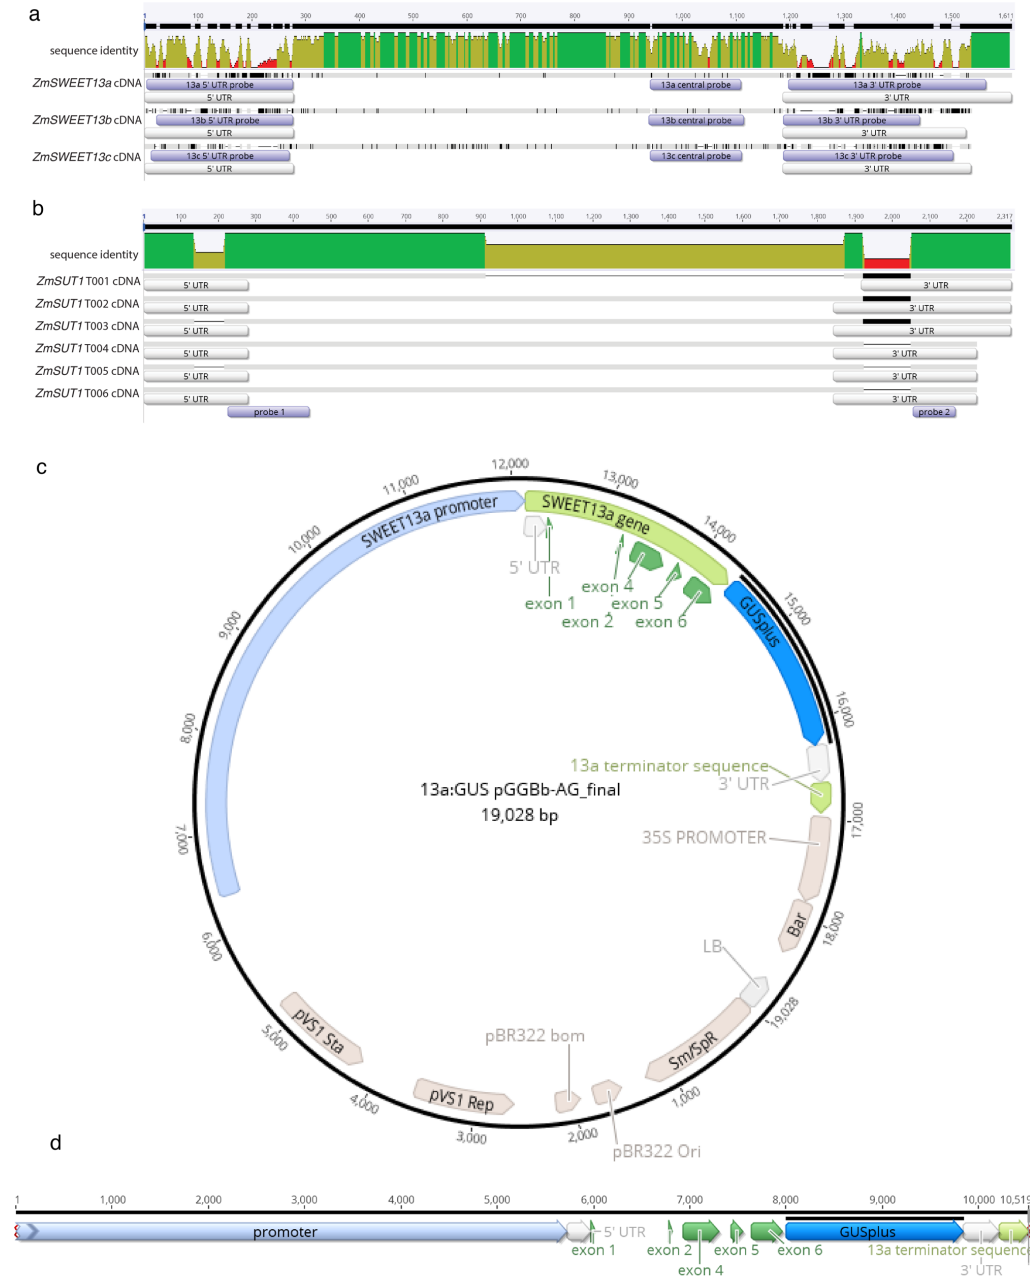

### Supplementary Figure 6. Probe design for in situ hybridization and pSWEET13a:SWEET13a:GUS construct schematic

**a.** *ZmSWEET13a*, *b*, and *c* aligned using MUSCLE in Geneious. Regions used as templates for RNA probes are highlighted in purple. Three probes in unique regions of each gene allowed us to differentiate between the homologs. **b.** The six isoforms of *ZmSUT1* aligned using MUSCLE in Geneious; two regions common to all six isoforms were selected for probe templates. Two unique regions in *ZmUMAMIT21a* and *ZmME1* were selected for probe templates. **c.** Circular schematic of plasmid used to transform B104. The construct included the 5751 bp upstream of the start codon (lavender), all exons and introns of the *SWEET13a* gene (green), a 9-alanine linker fused to *GUSplus* (blue), followed by 684 bp downstream of stop codon (green). **d.** linear schematic of the *SWEET13a:GUS* construct



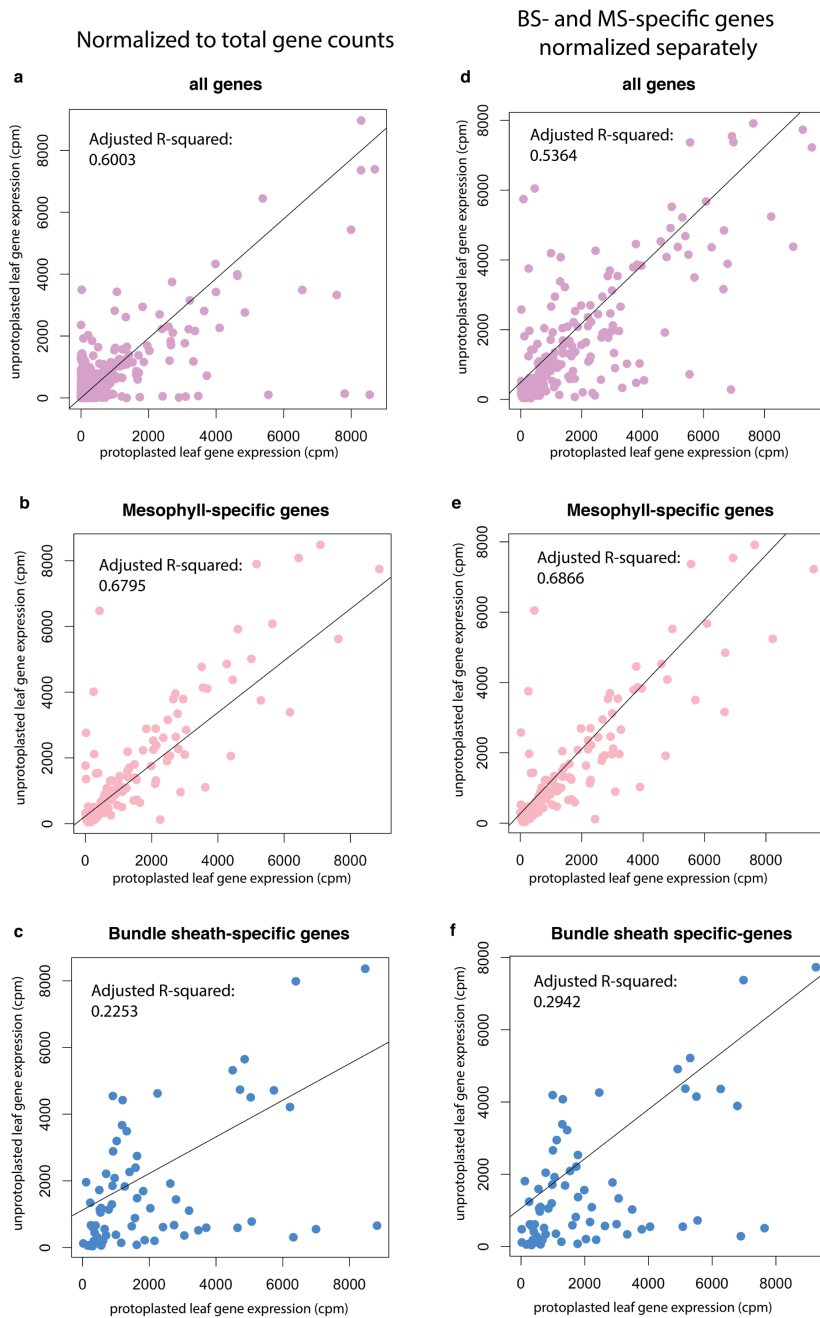

### Supplementary Figure 7. Correlation of mRNA counts between protoplasted cells and whole leaf

**a.** mRNA counts in whole leaf and protoplasted leaf expressed as counts per million reads (cpm) with adjusted R-squared values. **b.** mRNA counts for mesophyll cell-specific genes, as determined by unsupervised marker gene discovery (see materials and methods). **c.** mRNA counts for bundle sheath-specific genes. In **d-f:** counts of MS- and BS-specific genes were normalized separately to compensate for differing ratios of cell types represented in bulk leaf and protoplast samples. **d.** MS- and BS-specific genes, normalized separately. **e.** MS-specific genes normalized to total counts of MS-specific genes. **f.** BS-specific genes normalized to total counts of BS-specific genes. TMM method of normalization.

**Supplementary Table 2. mRNA enrichment of C4 photosynthesis-related genes in MS and BS clusters**

| <b>mesophyll</b>     | <b>Symbol or abbreviation</b> | <b>Log FC</b> | <b>Gene name</b>                                      |
|----------------------|-------------------------------|---------------|-------------------------------------------------------|
| Zm00001d031899       | <i>MDH6</i>                   | 3.00          | NADP-dependent malate dehydrogenase 6                 |
| Zm00001d046170       | <i>PEP1</i>                   | 3.20          | Phosphoenolpyruvate carboxylase 1                     |
| Zm00001d044099       | <i>CAH1</i>                   | 3.58          | Carbonic anhydrase 1                                  |
| Zm00001d011454       | <i>CAH6</i>                   | 3.58          | Carbonic anhydrase 6 (chloroplast localized)          |
| Zm00001d023929       | <i>OXMT1</i>                  | 1.50          | Oxo-glutarate/malate transporter1 (OMT)               |
| Zm00001d038163       | <i>PDK</i>                    | 1.45          | Pyruvate, phosphate dikinase 1                        |
| Zm00001d006520       | <i>PDRP1</i>                  | 2.95          | Pyruvate, phosphate dikinase regulatory protein 1     |
| Zm00001d032383       | <i>PPT1</i>                   | 0.99          | Phosphate/phosphoenolpyruvate translocator 1          |
| Zm00001d035737       | <i>PRK1</i>                   | 2.18          | D-glycerate 3-kinase chloroplastic                    |
| Zm00001d027488       | <i>GAPB1</i>                  | 2.10          | Glyceraldehyde phosphate dehydrogenase B1             |
| Zm00001d021310       | <i>TPI</i>                    | 2.54          | Triosephosphate isomerase                             |
| Zm00001d039131       | <i>AGP2</i>                   | 0.86          | ADP glucose pyrophosphorylase 2                       |
| Zm00001d027309       | <i>DPS4</i>                   | n/a           | Phosphoglucan phosphatase DSP4 chloroplastic          |
| <b>bundle sheath</b> | <b>Symbol or abbreviation</b> | <b>Log FC</b> | <b>Gene name</b>                                      |
| Zm00001d004894       | <i>RBCS2</i>                  | 5.19          | Ribulose biphosphate carboxylase small subunit 2      |
| Zm00001d052595       | <i>RBCS1</i>                  | 5.18          | Ribulose biphosphate carboxylase small subunit 1      |
| Zm00001d006402       | <i>RBCL</i>                   | 2.08          | Rubisco large chain (genomic, introns)                |
| Zm00001d028471       | <i>PCK1</i>                   | 4.23          | Phosphoenolpyruvate carboxykinase 1                   |
| Zm00001d000316       | <i>ME1</i>                    | 5.04          | NADP-dependent malic enzyme                           |
| Zm00001d045451       | <i>TK1</i>                    | 2.20          | Transketolase 1                                       |
| Zm00001d010321       | <i>PDK2</i>                   | 1.58          | Pyruvate orthophosphate dikinase 2                    |
| Zm00001d042050       | <i>MEP3</i>                   | 3.78          | Protein RETICULATA-RELATED 4                          |
| Zm00001d000164       | <i>PRK2</i>                   | 1.14          | Phosphoribulokinase chloroplastic 4                   |
| Zm00001d048593       | <i>RCA2</i>                   | 3.79          | Rubisco activase 2                                    |
| Zm00001d023559       | <i>FBPA</i>                   | 5.31          | Fructose-bisphosphate aldolase                        |
| Zm00001d053015       | <i>FBPA</i>                   | 2.89          | Fructose-bisphosphate aldolase                        |
| Zm00001d042840       | <i>SHBP1</i>                  | 3.78          | Sedoheptulose-17-bisphosphatase 3 chloroplastic       |
| Zm00001d018936       | <i>RPE</i>                    | 3.67          | Probable ribose-5-phosphate isomerase 3 chloroplastic |
| Zm00001d033910       | <i>AGPL1</i>                  | 2.14          | ADP glucose pyrophosphorylase large subunit leaf 1    |
| Zm00001d047077       | <i>BAM3</i>                   | 1.09          | Beta-amylase 3                                        |
| Zm00001d026337       | <i>SSIIIb</i>                 | 0.60          | Starch synthase IIIb-1                                |

**Supplementary Table 4. Genes used in this study**

| <b>AGPv4 ID</b> | <b>gene</b>           | <b>full name</b>                                             |
|-----------------|-----------------------|--------------------------------------------------------------|
| Zm00001d023677  | SWEET13a              | SWEET13a                                                     |
| Zm00001d023673  | SWEET3b               | SWEET13b                                                     |
| Zm00001d041067  | SWEET13c              | SWEET13c                                                     |
| Zm00001d027854  | SUT1                  | Sucrose Transporter 1                                        |
| Zm00001d048611  | MT1b                  | Metallothionein-like protein 1B                              |
| Zm00001d038558  | CC3                   | Cystatin3                                                    |
| Zm00001d004894  | RBCS2                 | ribulose biphosphate carboxylase small subunit2              |
| Zm00001d052595  | RBCS1                 | ribulose biphosphate carboxylase small subunit1              |
| Zm00001d000316  | ME1                   | NADP-dependent malic enzyme                                  |
| Zm00001d053281  | NAAT1                 | Nicotianamine aminotransferase                               |
| Zm00001d016441  | TAAT                  | Tyrosine aminotransferase                                    |
| Zm00001d044099  | CAH1                  | Carbonic anhydrase 1                                         |
| Zm00001d031899  | MD6                   | NADP-dependent malate dehydrogenase 6                        |
| Zm00001d046170  | PEP1                  | Phosphoenolpyruvate carboxylase 1                            |
| Zm00001d028471  | PCK1                  | Phosphoenolpyruvate carboxykinase 1                          |
| Zm00001d047658  | NAS10                 | Nicotianamine synthase10                                     |
| Zm00001d047651  | NAS1                  | Nicotianamine synthase 1                                     |
| Zm00001d028887  | NAS9                  | Nicotianamine synthase 9                                     |
| Zm00001d028888  | NAS2                  | Nicotianamine synthase2                                      |
| Zm00001d017429  | YS1                   | Iron-phytosiderophore transporter yellow stripe 1            |
| Zm00001d033496  | Nas3                  | Nicotianamine synthase 3                                     |
| Zm00001d035243  | AAAP45                | Amino acid permease 45                                       |
| Zm00001d012231  | AAAP56                | Amino acid permease 56                                       |
| Zm00001d035717  | UmamiT21a             | UmamiT21a                                                    |
| Zm00001d044951  | UmamiT20a             | UmamiT20a                                                    |
| Zm00001d010321  | PDK2                  | Pyruvate orthophosphate dikinase 2                           |
| Zm00001d038163  | PDK1                  | Pyruvate orthophosphate dikinase1                            |
| Zm00001d031899  | MDH6                  | NADP-dependent malate dehydrogenase 6                        |
| Zm00001d017958  | GLN4                  | glutamine synthetase 4 (gln1-3)                              |
| Zm00001d033747  | GLN2                  | glutamine synthetase 2 / Glutamine synthetase root isozyme 2 |
| Zm00001d026501  | GLN1                  | glutamine synthetase 1 leaf isozyme chloroplastic            |
| Zm00001d028260  | GLN3                  | glutamine synthetase 3 / 6 / root isozyme 5 (gln1-4)         |
| Zm00001d044768  | NRT1                  | Protein NRT1/ PTR FAMILY 5.8                                 |
| Zm00001d027268  | STP3                  | Sugar transport protein 3                                    |
| Zm00001d019062  | H <sup>+</sup> ATPase | membrane H <sup>(+)</sup> -ATPase3                           |
| Zm00001d018178  | bZIP4                 | basic leucine zipper 4 / ABA-insensitive 5-like protein      |
| Zm00001d010201  | MYB25                 | Transcription repressor MYB6 / myb25                         |
